1 A transcriptome atlas of leg muscles from healthy human volunteers reveals molecular and  
2 cellular signatures associated with muscle location

3 Tooba Abbassi-Daloi<sup>1#</sup>, Salma el Abdellaoui<sup>1</sup>, Lenard M. Voortman<sup>2</sup>, Thom Veeger<sup>3</sup>, Davy  
4 Cats<sup>4</sup>, Hailiang Mei<sup>4</sup>, Duncan E. Meuffels<sup>5</sup>, Ewoud van Arkel<sup>6</sup>, Peter A.C 't Hoen<sup>1,7\*</sup>, Hermien  
5 E. Kan<sup>4,8\*</sup>, Vered Raz<sup>1\*</sup>

6 <sup>1</sup>Department of Human Genetics, Leiden University Medical Center, Leiden, 2333 ZA, the Netherlands. <sup>2</sup>Division  
7 of Cell and Chemical Biology, Leiden University Medical Centre, Leiden, 2333 ZA, the Netherlands. <sup>3</sup>C.J. Gorter  
8 Center for High Field MRI, Department of Radiology, Leiden University Medical Center, Leiden, 2333 ZA, the  
9 Netherlands. <sup>4</sup>Sequencing Analysis Support Core, Leiden University Medical Center. <sup>5</sup>Orthopedic and Sport  
10 Medicine Department, Erasmus MC, University Medical Center Rotterdam, 3015 GD, Rotterdam, the  
11 Netherlands. <sup>6</sup>Orthopedics, Medisch Centrum Haaglanden, 2501 CK, Den Haag, the Netherlands. <sup>7</sup>Centre for  
12 Molecular and Biomolecular Informatics, Radboud Institute for Molecular Life Sciences, Radboud University  
13 Medical Center, 6525 EX, Nijmegen, the Netherlands. <sup>8</sup>Duchenne Center Netherlands, 5591 VE, Heeze, the  
14 Netherlands.

15 [Peter-Bram.tHoen@radboudumc.nl](mailto:Peter-Bram.tHoen@radboudumc.nl), [H.E.Kan@lumc.nl](mailto:H.E.Kan@lumc.nl), [V.Raz@lumc.nl](mailto:V.Raz@lumc.nl)

16

## 17 Abstract

18 Skeletal muscles support the stability and mobility of the skeleton but differ in biomechanical  
19 properties and physiological functions. The intrinsic factors that regulate muscle-specific  
20 characteristics are poorly understood. To study these, we constructed a large atlas of RNA-  
21 seq profiles from six leg muscles and two locations from one muscle, using biopsies from 20  
22 healthy young males. We identified differential expression patterns and cellular composition  
23 across the seven tissues using three bioinformatics approaches confirmed by large-scale  
24 newly developed quantitative immune-histology procedures. With all three procedures, the  
25 muscle samples clustered into three groups congruent with their anatomical location.  
26 Concomitant with genes marking oxidative metabolism, genes marking fast- or slow-twitch  
27 myofibers differed between the three groups. The groups of muscles with higher expression  
28 of slow-twitch genes were enriched in endothelial cells and showed higher capillary content.  
29 In addition, expression profiles of Homeobox (*HOX*) transcription factors differed between  
30 the three groups and were confirmed by spatial RNA hybridization. We created an open-  
31 source graphical interface to explore and visualize the leg muscle atlas  
32 (<https://tabbassidaloi.shinyapps.io/muscleAtlasShinyApp/>). Our study reveals molecular  
33 specialization of human leg muscles and provides a novel resource to study muscle-specific  
34 molecular features, which could be linked with (patho)physiological processes.

35 **Keywords:** Skeletal muscles, mRNA expression atlas, molecular and cellular signatures,  
36 Capillary density, Myofiber type, Homeobox genes

<sup>#</sup>Department of Bioinformatics, Maastricht University, Maastricht, 6211 LK, the Netherlands

## 37 Introduction

38 Skeletal muscles have *grosso modo* similar functions, generate the force for mobility and  
39 skeleton support, and maintain the body homeostasis. However, skeletal muscles differ in  
40 biomechanical and physiological features. These features include the size and contractile  
41 properties of the motor units and myofibers, differences in shortening velocity, resistance to  
42 fatigue, and differences in innervation and perfusion (Valentine 2017). Yet, the molecular and  
43 cellular differences that contribute to this muscle specialization are not fully understood. A  
44 molecular atlas for different skeletal muscles could assist in deciphering the molecular basis  
45 of muscle-specific physiological features. Such an atlas may also be used to study differential  
46 muscle involvement in various conditions, such as muscular dystrophies, myopathies,  
47 differences in regenerative potential, physiological compensation in sports and sarcopenia.  
48 In aging and muscle diseases, Muscle involvement it has been observed that some muscles  
49 were affected at an earlier age than others, and that this muscle involvement pattern can be  
50 characteristic for a given disease (Carrier, Laforet et al. 2011, Raz, Henseler et al. 2015,  
51 Albayda, Christopher-Stine et al. 2018, Brogna, Cristiano et al. 2018, Diaz-Manera, Fernandez-  
52 Torron et al. 2018, Servian-Morilla, Cabrera-Serrano et al. 2020). Several studies suggested  
53 that muscle-specific intrinsic molecular factors may explain this muscle involvement pattern  
54 (Kang, Kho et al. 2005, Rahimov, King et al. 2012, Huovinen, Penttila et al. 2015, Raz, Henseler  
55 et al. 2016, Terry, Zhang et al. 2018, Hettige, Tahir et al. 2020, Xi, Langerman et al. 2020). For  
56 example, differences in the cellular pathways and myofiber type (slow- and fast-twitch  
57 myofibers) composition between muscles could play a role (De Micheli, Spector et al. 2020,  
58 Rubenstein, Smith et al. 2020, Xi, Langerman et al. 2020), but may not fully explain the muscle  
59 involvement patterns.

60 Most of the studies characterizing the molecular variation between muscles were performed  
61 in mice (Campbell, Gordon et al. 2001, Porter, Khanna et al. 2001, Haslett, Kang et al. 2005,  
62 von der Hagen, Laval et al. 2005, Raz, Riaz et al. 2018, Terry, Zhang et al. 2018, Hettige, Tahir  
63 et al. 2020), where muscle-specific mRNA profiles were linked to distinct myofiber type  
64 composition (Campbell, Gordon et al. 2001, Raz, Riaz et al. 2018, Hettige, Tahir et al. 2020).

65 Since human muscle-related pathologies are not always recapitulated in mouse models (van  
66 Putten, Lloyd et al. 2020), understanding molecular variations between skeletal muscles  
67 should be performed in human samples. Only a few studies compared mRNA profiles between  
68 muscles from healthy human adults, and these studies face several limitations. Skeletal  
69 muscles are highly affected by age (McCormick and Vasilaki 2018, Aversa, Zhang et al. 2019),  
70 yet, the age range in previous studies was broad (Kang, Kho et al. 2005, Huovinen, Penttila et  
71 al. 2015). Moreover, the numbers of sampled muscles and subjects were limited (Abbassi-  
72 Daloi, Kan et al. 2020). A study using postmortem material (Kang, Kho et al. 2005) only partly  
73 reflects molecular composition in living muscles due to storage in cooling conditions.  
74 Understanding muscle involvement in different pathologies can benefit from a molecular  
75 atlas of human muscles.

76 We generated a transcriptome atlas from six leg muscles and two locations from one muscle  
77 to explore molecular variations within and between muscles. Paired samples were obtained

78 from 20 healthy male subjects of  $25 \pm 3.6$  years old. We show that the seven muscle tissues  
79 clustered into three groups, distinguished by cell type composition and mRNA expression  
80 profiles. We confirmed the transcriptome analyses with large-scale quantitative  
81 immunohistochemistry and RNA *in situ* hybridization procedures. We discuss the value of this  
82 skeletal muscle atlas resource to understand human health and pathologies affecting skeletal  
83 muscle tissues.

## 84 Results

### 85 Transcriptome atlas of adult human skeletal muscles

86 To determine molecular signatures marking leg muscles, we generated a transcriptome atlas  
87 of human skeletal muscles by sequencing biopsies from five upper leg muscles, gracilis (GR),  
88 semitendinosus (ST), rectus femoris (RF), vastus lateralis (VL), and vastus medialis (VM)  
89 muscles, and one lower leg muscle, gastrocnemius lateralis (GL) (Figure 1A). We also  
90 investigated molecular differences within one muscle by including biopsies from the middle  
91 and distal end of the semitendinosus muscle (STM and STD, respectively). These two biopsies  
92 were treated as independent muscle samples in subsequent analyses (Figure 1B and C). In  
93 total, 128 samples from 20 individuals (aged  $25 \pm 3.6$  yr) were analyzed (Supplementary Figure  
94 S1), making this currently the largest freely available human muscle atlas. Supplementary  
95 Table S1 shows the sample characteristics.

### 96 Variation in cell type composition between different muscles

97 Skeletal muscle is a heterogeneous tissue containing multiple cell types. The differences in  
98 the abundance of these cell types can be reflected in bulk RNA-seq profiles. Therefore, we  
99 used RNA-seq data to first explore possible cell type heterogeneity between leg muscles. We  
100 summarized the expression level of genes marking each cell type present in human skeletal  
101 muscles by calculating their first principal components (eigenvectors) (Supplementary Table  
102 S2). We used the eigenvalues of the eigenvectors representing the different cell types to  
103 cluster the muscles (Figure 2A) and to identify cell types with significant differences in relative  
104 abundance between muscles (Supplementary Figure S2A). The muscle tissues clustered into  
105 three groups, Group 1 (G1): GR, STM, and STD; Group 2 (G2): RF, VL, and VM; GL was the only  
106 muscle in Group 3 (G3) (Figure 2A). The relative abundance of endothelial cells was  
107 statistically the most different between muscles, with higher abundance in G2 and G3 than in  
108 G1 (Figure 2A-B, Supplementary Figure S2A). Other cell types marking blood vessels, namely  
109 pericytes, post-capillary venule (PCV) endothelial cells, natural killer (NK) cells, T and B cells,  
110 and myeloid cells, clustered together with the endothelial cells and all showed a higher  
111 abundance in G2 and G3 compared with G1 (Figure 2A-B). These results could suggest a higher  
112 capillary density and blood perfusion in/of the muscles in G2 and G3.

113 Genes marking fast-twitch myofibers showed overall higher expression levels in G1, while  
114 slow-twitch genes were higher in G2 and G3 (Figure 2A-B). Differences in the relative  
115 abundance of non-muscle cell types, pericytes, immune cells, and endothelial cells,  
116 distinguished G3 from the G1 and G2 muscles (Supplementary Figure S2B, Figure 2A-B).

117 While STM and STD showed significant differences in the relative abundance of genes marking  
118 endothelial cells (higher expression in STD) and slow-twitch myofibers (higher expression in  
119 STM), there were no significant differences between ST and GR, and within the G2 muscles.  
120 This suggests that differences between regions of the same muscle may be larger than  
121 differences between distinct muscles (Supplementary Figure S2A).

### 122 Further study of differences in myofiber type composition between groups of muscles

123 To confirm the differences in myofiber types between muscles, we performed  
124 immunofluorescence staining for all muscles with a mixture of antibodies to three MyHC  
125 isoforms and anti-laminin antibody (Figure 3A). We developed a semi-automated image  
126 processing workflow to segment the myofibers using laminin staining and to quantify the  
127 fluorescence intensity of each MyHC isoform per myofiber. We next identified myofiber types  
128 by clustering all the myofibers using the MFI values of the three MyHC isoforms. The vast  
129 majority of the myofibers (94%) were assigned to three major clusters (Figure 3B). Each  
130 myofiber cluster had a major MyHC isoform (Figure 3C). Consistent with our study in human  
131 *vastus lateralis* muscle (Raz, van den Akker et al. 2020), the results here suggest that the  
132 myofibers are generally not purely type -I, -IIA, or -IIX but contain a mix of myosin heavy chain  
133 isoforms. We observed relatively high correlations from 0.55 to 0.62 between normalized  
134 gene expression of the dominant MyHC in each cluster and the proportion of myofibers  
135 assigned to the corresponding cluster (Figure 3D-F). This correlation demonstrates the  
136 reliability of our RNA-seq-based assessment of MyHC expression.

137 In agreement with the results of the RNA-seq cell type composition analysis (Figure 2A-B), the  
138 quantitative histology analysis demonstrated a higher proportion of slow-twitch (oxidative)  
139 myofibers and a lower proportion of MyHC2X-dominated myofibers in G2 and GL (G3)  
140 muscles than in G1 muscles (Figure 3G, Supplementary Figure S3). The quantitative histology  
141 analysis further showed that G2 muscles had a higher proportion of MyHC2A-dominated  
142 myofibers than the G3 muscle (Figure 3G, Supplementary Figure S3), highlighting a distinct  
143 myofiber type composition of the GL muscle.

144 The myofiber composition results further showed a higher proportion of MyHC2X-dominated  
145 myofibers in STD than in STM, whereas STM had a higher proportion of MyHC1 and MyHC2A-  
146 dominated myofibers (Supplementary Figure S3). This confirms the existence of regional  
147 differences within a muscle (Bindellini, Voortman et al. 2021).

### 148 Higher capillary density in GL

149 The RNA-seq cell type composition analysis suggested a higher proportion of endothelial and  
150 other cell types marking blood vessels in the GL muscle than in other muscles. To confirm this  
151 observation, we immunostained for the endothelial cells using antibodies against Endoglin  
152 (ENG) and CD31 proteins (Tey, Robertson et al. 2019). We included cryosections of GL and  
153 STM with the largest differences in the expression of genes marking endothelial cells (Figure  
154 4A). We observed a higher proportion of CD31-positive areas in GL (Figure 4B), which was  
155 consistent with higher *CD31* RNA expression levels in this muscle (Figure 4C).



156 Next, we determined the muscles' capillary density by counting small circular objects stained  
157 positive for both CD31 and ENG (Wehrhan, Stockmann et al. 2011). We observed a higher  
158 capillary density in GL compared with STM (Figure 4D). This observation is consistent with a  
159 higher proportion of endothelial cell types in GL compared with muscles in G1 or G2.

### 160 Gene expression profiles and molecular pathways distinguishing muscle clusters

161 We next investigated whether muscle-specific gene expression profiles, not explained by cell  
162 type composition, could also be found in our dataset. To this end, we determined the  
163 differentially expressed genes (DEGs) in every pairwise comparison (Supplementary Figure  
164 S4A, Supplementary Table S3). The DEGs that were driven by differences in cell type  
165 composition were excluded (Pearson's  $R > 0.5$  between gene expression levels and the  
166 eigenvector of any cell type). The proportion of DEGs that were not driven by cell type  
167 composition but discriminated each pair of muscles are shown in Figure 5A. The muscles  
168 clustered in a similar way as was observed in the cell type composition analysis: GR, STM, and  
169 STD (G1), RF, VL, and VM (G2), and GL (G3) (Figure 5A).

170 To further study muscle-specific expression profiles, we applied weighted gene co-expression  
171 network analysis (WGCNA). We identified 35 modules of co-expressed genes (Supplementary  
172 Table S4). For each module, we calculated the module eigengene (ME) that represents gene  
173 expression levels of the genes in the module. We then implemented a pairwise comparison  
174 to find modules showing significant differences in every pairwise comparison (Supplementary  
175 Figure S4B-C). Out of the 35 modules, 27 showed a difference between at least two muscles  
176 (module size range: 38-1,459; containing 10,695 genes in total). Nine out of the 27 muscle-  
177 related modules had at least five genes marking a specific cell type and were therefore  
178 defined as modules driven by differences in cell type composition and were not considered  
179 for further analysis (Supplementary Figure S4D). Figure 5B shows the remaining modules that  
180 were not driven by cell type composition, nevertheless distinguished pairs of muscles. We  
181 then plotted the mean eigenvalues of muscle-related modules in a heatmap (Figure 5C) to  
182 determine the clustering of muscles based on the expression patterns of genes in the  
183 modules. The WGCNA-based clustering was consistent with the cell type composition and  
184 differential expression groups (Figure 5C). In total, seven out of the 18 muscle-related  
185 modules demonstrated higher expression levels in G1, four modules had higher expression in  
186 G2 and G3, and three modules demonstrated higher expression levels in G3 only (Figure 5C).  
187 In addition, although none of the modules showed distinct expression patterns between  
188 muscles in G2 and between ST and GR, M.21 module showed higher expression levels in STM  
189 than STD (Supplementary Figure S4C).

190 To explore the molecular and cellular pathways in the three groups, functional enrichment  
191 analysis was performed in the muscle-related modules. The most significantly enriched  
192 biological processes and molecular functions within these modules are listed in Table 1 (a  
193 complete list is in Supplementary Table S5).

## 194 Higher expression of mitochondrial genes in G2 and G3 muscles consistent with higher 195 proportion of slow myofibers

196 In the M.13 module, with higher expression in G2 (VL, VM, and RF) and G3 (GL), the  
197 mitochondrial-related genes were enriched (Table 1). Eighteen out of 122 genes enriched for  
198 mitochondria in this module were hub genes, highly interconnected genes in the module  
199 (Table 1). To assess a potential impact on mitochondrial metabolic processes, we mapped the  
200 122 genes to mitochondrial pathways (Figure 6). The most enriched processes were the  
201 respiratory electron transport chain in oxidative phosphorylation, the tricarboxylic acid (TCA)  
202 cycle, and beta-oxidation. This observation suggests a higher oxidative metabolism in G2 and  
203 G3, which is consistent with a higher proportion of slow myofibers.

## 204 Homeobox transcription factors contribute to the mRNA diversity between the three 205 groups of muscles

206 An enrichment for “anterior/posterior pattern specification” in M.14 was observed, with  
207 higher expression in G2 and G3 (Table 1). This module included *HOX* hub genes (Figure 7A).  
208 To assess whether the diversity between the groups of muscles was associated with the  
209 pattern of *HOX* gene expression, we plotted the normalized expression of all expressed *HOX*  
210 genes across all samples (Figure 7B). Remarkably, clustering based on *HOX* gene expression  
211 clearly separated the G1 from the G2 and G3 muscles (Figure 7B). Moreover, eleven out of 36  
212 *HOX* genes were assigned to three of the muscle-related modules (M.14, M.30, and M.32),  
213 which showed the largest differences between the three groups of muscles (Figure 7B). Two  
214 *HOX* genes were selected (*HOXA10* and *HOXC10*) to further confirm the differences in  
215 expression between muscles using the *in situ* hybridization (ISH) procedure (Figure 8A). We  
216 included samples from GL and STM showing the largest difference in *HOX* genes expression.  
217 The *HOX* signal was mainly localized in myofibers (Figure 8A). Per sample, the average number  
218 of foci per myofiber was calculated revealing a higher number of *HOXA10* and *HOXC10* single  
219 molecule RNAs in STM compared with GL (Figure 8B). The ISH results were consistent with  
220 the RNA-seq data (Figure 8B-C), further demonstrating the robustness of our RNA-seq data.

## 221 Web application for exploring transcriptome atlas of human skeletal muscles

222 To facilitate data reuse and exploration of human skeletal muscle atlas, we developed a web  
223 application (<https://tabbassidaloi.shinyapps.io/muscleAtlasShinyApp>), enabling users to look  
224 up the sample information and the expression of any gene of interest. In addition, users can  
225 explore the list of genes used for the cell type composition analysis and their expression levels  
226 across all the samples. Furthermore, users can list and visualize the differentially expressed  
227 genes and the modules and their hub genes.

## 228 Discussion

229 We generated a large skeletal muscle transcriptome atlas from 20 young healthy males. We  
230 included six leg muscles and two locations within one muscle. The atlas presented in this study  
231 is unique in terms of the number of muscles, the individuals included, and the age range of

232 the participants. We confirmed the RNA-seq analysis using large-scale quantitative  
233 immunohistochemistry and mRNA in situ hybridization. Based on cell type composition,  
234 differential expression analysis and WGCNA, the seven leg muscle tissues consistently  
235 clustered into three groups: G1) GR, STM, and STD; G2) VL, VM, and RF; G3) GL. The muscles  
236 in G2 and G3 (VL, VM, RF and GL) showed higher proportions of slow myofiber types and  
237 higher capillary densities. GL, the only lower leg muscle, was distinct from VL, VM, and RF in  
238 its lower proportion of type 2A myofibers and a higher proportion of non-muscle cells.  
239 *HOXA10* and *HOXC10* expression were lower in VL, VM, RF and GL than in GR, STM, and STD  
240 muscles.

#### 241 Molecular diversity between muscles in different anatomical locations

242 The muscles included in this study mobilize and stabilize the knee joint. Muscles of the  
243 hamstrings (ST and GR) clustered together (G1), and muscles of the quadriceps (RF, VL and  
244 VM) clustered together (G2). The Hamstrings and quadriceps alternate in contraction and  
245 relaxation to flex, extend and stabilize the knee and aid in moving of the thigh. GL, the only  
246 lower leg muscle in our set, is located on the posterior side of the knee, allowing flexion of  
247 the knee and plantar flexion of the ankle. Our study suggests that there is little molecular  
248 diversity between muscles of the same group, as compared to muscles in different groups of  
249 muscles.

250 We observed a higher proportion of fast-twitch myofibers in G1 compared with G2 and G3.  
251 This could be due to the role of the hamstrings in activities that require a large power output  
252 since fast-twitch myofibers are used more in these activities than slow-twitch myofibers  
253 (Bottinelli, Pellegrino et al. 1999, Willigenburg, McNally et al. 2014, Camic, Kovacs et al. 2015).  
254 Slow-twitch myofibers have a higher mitochondrial content compared with fast-twitch  
255 myofibers (Berchtold, Brinkmeier et al. 2000, Gouspillou, Sgarioto et al. 2014). Consistently,  
256 G2 and G3 muscles showed higher expression of genes encoding for mitochondrial proteins  
257 and a higher ratio of slow-twitch myofibers compared with G1. Slow-twitch muscles are also  
258 supplied by a denser capillary network (Nishiyama 1965, Murakami, Fujino et al. 2010,  
259 Korthuis 2011). Indeed, we observed a higher capillary density and higher endothelial cells in  
260 G3. The three groups of muscles also differed by the expression of *HOX* genes, specifically,  
261 *HOXA* and *HOXC* family members. *Hox* genes establish the anterior/posterior patterning  
262 during vertebrate embryonic limb development (Zakany and Duboule 2007). Interestingly, the  
263 development of these groups of leg muscles differs in developmental time (Diogo, Siomava  
264 et al. 2019), consistent with the expression of *Hox* genes (Zakany and Duboule 2007). *Hox*  
265 genes expression is not limited to embryonic development, but was found also in adult mouse  
266 muscles (Houghton and Rosenthal 1999, Yoshioka, Nagahisa et al. 2021), and *Hoxa10* gene  
267 was differentially expressed across adult limb mouse muscles (Yoshioka, Nagahisa et al. 2021).  
268 Moreover, Yoshioka, Nagahisa et al. (2021) demonstrated that *Hoxa10* expression in adult  
269 satellite cells affects muscle regeneration in mice. Here, we show that both *HOXA* and *HOXC*  
270 gene family are expressed in myofibers, and their expression levels differs between leg  
271 muscles. Yoshioka, Nagahisa et al. (2021) also showed expression of *HOX* genes in adult

272 human muscle tissues. Yet, Terry, Zhang et al. (2018) concluded that the expression pattern  
273 of *Hox* genes in adult muscles is insufficient to explain the mRNA expression diversity in adult  
274 mouse skeletal muscles. Whether *HOX* genes are transcriptionally active in adult myofibers is  
275 a subject for future studies.

#### 276 Potential relevance to muscles disease and aging

277 In several muscle-related diseases like muscular dystrophies (MDs), muscle weakness and  
278 pathological features like replacement of muscle tissue with fat start in specific muscles and  
279 spreads to others as disease progresses (Emery 2002). This pattern differs between diseases,  
280 and the reason for the disease-specific involvement pattern is unknown. Exploring the  
281 molecular signatures that contribute to the differences between muscles may elucidate the  
282 pathophysiology of these diseases. For example, in Duchenne muscular dystrophy (DMD),  
283 which is caused by mutations in the *DMD* gene, the quadriceps is involved earlier, whereas  
284 the hamstring muscles are less involved, and the GR is spared (Wokke, van den Bergen et al.  
285 2014, Hooijmans, Niks et al. 2017). The observed higher expression level of the *DMD* gene in  
286 ST and GR may be related to the late involvement in DMD patients during disease progression.  
287 Accessing the expression level of genes and implementing a quantitative approach (Veeger,  
288 van Zwet et al. 2021) to evaluate the association between leg muscle architectural  
289 characteristics and gene expression levels could be performed for other muscle diseases.

#### 290 Regional differences within muscles

291 The molecular and cellular differences between the samples from distal and middle locations  
292 of ST were larger than differences between ST and GR (Supplementary Figure S2). One module  
293 of co-expressed genes, M.21, showed a different expression pattern between STM and STD.  
294 This module was enriched for the cellular amino acid catabolic process and monocarboxylic  
295 acid catabolic process (Supplementary Table S5). While the distal side of the ST muscle has a  
296 rounded tendon, the differences between STM and STD cannot be explained by  
297 contamination of tendon tissue or closer proximity to the tendon, because we did not find a  
298 difference in the estimated tenocyte proportions between biopsies collected from the distal  
299 and middle parts of the muscle (Supplementary Figure S2). The myofiber composition was  
300 different between the distal and medial part of the ST muscle (Supplementary Figure S2A,  
301 Supplementary Figure S3). A divergent myofiber type composition of biopsies from superficial  
302 and deep areas of the same human muscle was reported by Johnson, Polgar et al. (1973) for  
303 the GL, RF, VL, VM, *adductor magnus*, *soleus*, and *tibialis anterior* muscles in the leg and thigh.  
304 Bindellini, Voortman et al. (2021) also reported different proportions of MyHC2A myofibers  
305 in distal and middle parts of *tibialis anterior* in mice.

#### 306 Interindividual differences were larger than differences between muscles

307 Despite the narrow age range and an inclusion of only one gender in our study, we observed  
308 that the percentage of variance explained by the individual surpassed the variance explained  
309 by the muscles (Supplementary Figure S5F). This is in agreement with findings from Kang, Kho  
310 et al. (2005). The inter-individual variations are possibly resulting from genetic and  
311 environmental (activity, exercise, diet, etc.) factors. To account for inter-individual variation,

312 we included the individual as a random effect in the different analyses and constructed a  
313 consensus gene co-expression network by merging the co-expression networks separately  
314 constructed per individual. Only after properly accounting for interindividual differences, we  
315 could identify the intrinsic differences between leg muscles.

## 316 **Study limitations**

317 Differences in cell type composition between muscles are best captured using single-cell  
318 sequencing. Previous single cell (De Micheli, Spector et al. 2020, Rubenstein, Smith et al. 2020,  
319 Xi, Langerman et al. 2020) and single nucleus (Orchard, Manickam et al. 2021, Perez, McGirr  
320 et al. 2021) studies reported the cellular composition of adult human muscles, where single  
321 nucleus profiling is preferred because myofibers cannot be dispersed into single cell  
322 suspensions. The high costs associated with single-cell technologies are currently prohibitive  
323 for performing large scale analyses of >100 samples such as performed in our study. Here, we  
324 evaluated differences in cellular composition by deconvolution of bulk RNA-seq based on  
325 marker genes reported in single-cell studies. This approach appeared to be suitable for  
326 analyzing differences in cellular composition between large sets of samples, as we observed  
327 good consistency with immunohistochemistry-based analyses of myofiber type and  
328 endothelial cell composition. A limitation of the deconvolution approach is, however, that this  
329 only captures cell types for which discriminative marker genes are available.

330 We further acknowledge that RNA expression levels do not necessarily match protein  
331 abundance in muscles and do not reflect post translational modifications (Greenbaum,  
332 Colangelo et al. 2003, Liu, Beyer et al. 2016). Although a protein atlas could relate to muscle  
333 cell function better than RNA expression profiles, generating a genome-wide proteome in  
334 skeletal muscles is challenging, as muscle proteomes are dominated by the high abundance  
335 of high molecular weight sarcomeric proteins, and capturing the low abundance proteins is  
336 challenging. Despite this limitation, we showed consistency between results obtained by  
337 mRNA expression profiling and immunohistochemical staining of the proteins that were in  
338 focus in our study.

339 In summary, we demonstrated divergent molecular and cellular compositions between  
340 skeletal muscles in different anatomically adjacent locations. Overall, the consistency of the  
341 gene expression patterns, and the results obtained from the immunohistochemistry and RNA  
342 in situ hybridization experiments indicates the high accuracy and reliability of the  
343 transcriptome atlas generated in this study. Therefore, this atlas provides a resource for  
344 exploring molecular characteristics of muscles and studying the association between  
345 molecular signatures, muscle (patho)physiology and biomechanics.

## 346 **Materials and methods**

### 347 **1. Subject characteristics and biopsy collection**

348 Healthy male subjects (aged 18-32) undergoing surgery of the knee for anterior cruciate  
349 ligament (ACL) reconstruction using hamstring autografts were recruited from outpatient



350 clinics of two hospitals: Erasmus Medical Center and Medisch Centrum Haaglanden. Inclusion  
351 criteria included age, sex, and the amount of routine exercise. Subjects eligible for  
352 reconstructive ACL surgery were mobile, had full range of knee motion, minimal to no knee  
353 swelling and had physiotherapy until the surgery.

354 A total of seven biopsies were taken from six different leg muscles (Figure 1A). To study  
355 molecular differences within the muscle, two biopsies from the middle and distal sides of the  
356 semitendinosus muscle (STM and STD, respectively) were collected. During the surgery, the  
357 tendons of the gracilis (GR) and semitendinosus muscles were used to reconstruct the ACL,  
358 and biopsies from these muscles were taken directly from the graft after harvesting the  
359 autografts at the beginning of the operation. After the ACL construction, biopsies from  
360 gastrocnemius lateralis (GL) rectus femoris (RF), vastus lateralis (VL), and vastus medialis (VM)  
361 muscles were taken by percutaneous biopsy (modified Bergstrom (Bergstrom 1975)) using a  
362 minimally invasive biopsy needle. All biopsies were immediately frozen in liquid nitrogen and  
363 were kept at -80°C.

364 The study was approved by the local Medical Ethical Review Board of The Hague Zuid-West  
365 and the Erasmus Medical Centre and conducted in accordance with the ethical standards  
366 stated in the 1964 Declaration of Helsinki and its later amendments (ABR number:  
367 NL54081.098.16). All subjects provided written informed consent prior to participation.

## 368 2. Sample processing, RNA isolation, and cDNA library preparation

369 Biopsies were cryosectioned for RNA isolation, immunofluorescence staining, and *in situ*  
370 hybridization. For each sample, three cryosections of 16 µm thick were collected onto  
371 SuperFrost slides (Thermo Fisher Scientific, 12372098) and stored at -20°C prior to staining.  
372 For *in situ* hybridization, the cryosections were mounted on SuperFrost Plus Adhesion slides  
373 (Thermo Fisher Scientific, 12625336) and stored at -80°C. For the RNA isolation, cryosections  
374 were transferred into MagNA lyser green beads tubes (Roche, 3358941001). Then, they were  
375 homogenized in QIAzol lysis reagent (Qiagen, 79306) using the MagNA Lyser. Subsequently,  
376 total RNA was purified with chloroform. For samples from a subset of individuals, RNA was  
377 precipitated with isopropyl alcohol (Supplementary Table S1). For the other samples total  
378 RNA was mixed with an equal volume of 70% ethanol and further purified with miRNeasy Mini  
379 Kit (217004, Qiagen) using the manufacturer's protocol (Supplementary Table S1). To  
380 evaluate the effect of two different RNA isolation protocols, RNA from five GR samples were  
381 isolated with both protocols (Supplementary Figure S5A). For both protocols, DNA was  
382 removed using RNase-free DNase set (Qiagen, 79254) using the manufacturer's protocol.  
383 RNA integrity was assessed with the Agilent 2100 Bioanalyzer using Eukaryote Total RNA Nano  
384 chips according to the manufacturer's protocol (Agilent BioAnalyzer, 824.070.709)  
385 (Supplementary Table S1).

386 Poly(A) library preparation was performed in four batches each with 39 samples at Leiden  
387 Genome Technology Center (LGTC, the Netherlands). Information on the RNA isolation  
388 protocol and library preparation batches used for each sample can be found in Supplementary  
389 Table S1. Samples from different muscles and individuals were equally distributed in each

390 library batch to minimize a batch effect bias. Approximately 200ng of total RNA was used as  
391 starting material. mRNA was enriched using oligo dT beads (polyA+ bead-based enrichment),  
392 fragmented, and converted to cDNA using random hexamers and SuperScript III (Invitrogen).  
393 End-repair, A-tailing, and adapter ligation were performed using NEBNext chemistry (New  
394 England Biolabs) and xGen dual index UMI adapters (Integrated DNA Technologies) according  
395 to the manufacturer's protocol. Finally, USER digest (New England Biolabs) and 15 cycles of  
396 library amplification were performed. Libraries were purified with XP beads and analyzed for  
397 size and purity on a Bioanalyzer DNA HS chip (Agilent BioAnalyzer, 5067-1504).

### 398 3. Bulk RNA-sequencing and analysis

399 Illumina sequencing was performed by GenomeScan BV (Leiden, the Netherlands) on a  
400 Novaseq-6000 producing paired-end 2 × 150 bp reads. Fastq files were processed using the  
401 BioWDL pipeline for processing RNA-seq data (v3.0.0,  
402 <https://zenodo.org/record/3713261#.X4GpD2MzYck>) developed by the sequencing analysis  
403 support core (SASC) team at LUMC. The BioWDL pipeline performs FASTQ pre-processing,  
404 RNA-seq alignment, deduplication using unique molecular identifiers (UMIs), variant calling,  
405 and read quantification. FastQC (v0.11.7)  
406 (<https://www.bioinformatics.babraham.ac.uk/projects/fastqc/>) was used for checking raw  
407 read QC. Adapter clipping was performed using Cutadapt (v2.4) (Martin 2011) with default  
408 settings, followed by checking the QC using FastQC. RNA-Seq reads' alignment was performed  
409 using STAR (v2.7.3a) (Dobin, Davis et al. 2013) against the GRCh38 reference genome. PCR  
410 duplications were removed based on UMIs using UMI-tools (v0.5.5) (Smith, Heger et al. 2017).  
411 Gene read quantification was performed using HTSeq-count (v0.11.2) (Anders, Pyl et al.  
412 2015). Ensembl version 98 (<http://sep2019.archive.ensembl.org/>) was used for gene  
413 annotation. Samples with less than 5M reads assigned to annotated exons were re-sequenced  
414 or excluded from all downstream analyses. A SNP calling was performed using GATK4  
415 (v4.1.0.0) (McKenna, Hanna et al. 2010). Possible sample swapping was checked using an SNP  
416 panel with 50 SNPs (Yousefi, Abbassi-Daloi et al. 2018). The similarity for calls of these SNPs  
417 showed that two samples in the same RNA isolation batch were swapped. We revised the  
418 labels of these two samples in our dataset for downstream analyses.

419 We performed all the analyses in RStudio Software (v1.3.959)(RStudio-Team 2020) using R  
420 Statistical Software (v4.0.2)(R-Core-Team 2020). Samples with more than 5M reads assigned  
421 to annotated exons were included in all downstream analyses (Supplementary Figure S5B).  
422 The HTSeq count table was used to create a DGEList object using the edgeR Bioconductor  
423 package (v3.30.3) (Robinson, McCarthy et al. 2010). The filterByExpr function from the edgeR  
424 Bioconductor package was used to keep genes with 10 or more reads in at least 16 samples  
425 (the number of samples in the smallest muscle group). The dataset was normalized using the  
426 calcNormFactors function (considering trimmed mean of M-values (TMM) method) from the  
427 edgeR Bioconductor package.

#### 428 4. Quality control and batch effect correction

429 We performed principal component analysis (PCA) to evaluate the main difference between  
430 samples in an unsupervised manner. Log-transformed expression values after normalization  
431 by counts per million (CPM) were used to calculate principal components using the base  
432 function `prcomp` with the center and scale argument set to TRUE.

433 We then performed the analysis of variance to determine the factors driving gene expression  
434 variations. We estimated the contribution of known biological (muscle tissues and Individuals)  
435 and technical (RNA isolation protocol, RIN score, initial RNA concentration, library preparation  
436 batch, sequencing lane, and library size) factors on variation of gene expression. Data  
437 transformed by the *voom* function from the *limma* Bioconductor package (v3.44.3) (Law,  
438 Chen et al. 2014, Ritchie, Phipson et al. 2015) was used to fit a linear model for each gene.  
439 We included all biological and technical factors as fixed effects and fitted the following linear  
440 model:

441 Formula-1:  $voom - transformed\ expression_{gene} \sim muscle + individual + RNA\ isolation\ protocol +$   
442  $RIN\ score + concentration + library\ preparation\ batch + sequencing\ lane + library\ size + error$

443 We used ANOVA from the *car* R package (v3.0-10) (Fox and Weisberg 2019) to estimate the  
444 relative contribution of each of these factors in the total variation of gene expression.  
445 Outcomes from both PCA and ANOVA revealed a strong library preparation batch effect  
446 (Supplementary Figure S5C and D), while the effect of other technical factors (RNA isolation  
447 protocol, initial RNA concentration, RIN score, and library size) was minimal (Supplementary  
448 Figure S5D). Accordingly, the HTSeq count table was corrected for the batch effect by the  
449 *ComBat-seq* Bioconductor package (Zhang, Parmigiani et al. 2020). The muscle was included  
450 in the *ComBat-seq* model to preserve possible molecular differences between muscles. The  
451 *ComBat-Seq* count table was used to create a *DGEList* object, followed by removing the low  
452 expressed genes and additional normalization using `filterByExpr` and `calcNormFactors`  
453 functions, respectively.

454 Outcomes of PCA and ANOVA confirmed the proper removal of the batch effect  
455 (Supplementary Figure S5E and F). In addition, the percentage of variance explained by the  
456 individual was found to be bigger than the variance explained by the muscle (Supplementary  
457 Figure S5F). We, therefore, included the individual as a random effect in all different analyses.  
458 Moreover, the RIN score was not considered as an exclusion criterion as it did not contribute  
459 to gene expression variation (Supplementary Figure S5F).

#### 460 5. cell type composition estimation

461 We collected lists of genes marking different cell types that are present in human skeletal  
462 muscles from different studies (Smith, Meyer et al. 2013, Kendal, Layton et al. 2019, Perucca  
463 Orfei, Viganò et al. 2019, Rubenstein, Smith et al. 2020)(Supplementary Table S2). The  
464 expression of genes marking each cell type was summarized by their eigenvector (first  
465 principal component). We subsequently fitted a linear-mixed model to the eigenvector of  
466 each cell type using the `lmer` function from the *lmerTest* R package (3.1-3) (Kuznetsova,

467 Brockhoff et al. 2017). These models included muscle as a fixed effect and individual as a  
468 random effect shown in the formula below:

469 Formula-2:  $eigenvector_{cell\ type} \sim muscle + (1|individual) + error$

470 We tested the significance of fixed effects with the ANOVA from the car R package. The  
471 Benjamini-Hochberg false-discovery rate (FDR) was applied to adjust for multiple testing. We  
472 conducted post-hoc pairwise comparisons using the lsmeans R package (v2.30-0)(Lenth 2016)  
473 to identify a significant difference in the expression level of genes marking different cell types  
474 between different muscles. We used the pheatmap function from the pheatmap R package  
475 (v1.0.12) (<https://CRAN.R-project.org/package=pheatmap>) with the difficult setting to draw  
476 all the heatmaps.

## 477 6. Differential expression analysis (DEA)

478 We used the *voom*-transformed data to fit linear mixed-effects models for each gene using  
479 the lmer function from the lmerTest R package. The individual and muscle were included in  
480 the models as a random-effect and a fixed-effect, respectively, similarly to the formula-2. The  
481 *voom* precision weights showing the mean-variance trend for each observation were  
482 incorporated into the models. We tested the significance of fixed effects with the ANOVA  
483 from the car R package and the FDR was applied to adjust for multiple testing. We conducted  
484 post-hoc pairwise comparisons using the lsmeans R package to identify significant differences  
485 between each pair of muscles.

486 We calculated the Pearson correlation between differentially expressed genes (DEGs, FDR <  
487 0.05) and the eigenvector of each cell type using the cor and cor.test from the stats R package.  
488 We adjusted for multiple testing using the FDR. DEGs which were significantly associated with  
489 a cell type eigenvector (Pearson correlation < 0.5 and FDR > 0.05) were defined as cell type  
490 related.

## 491 7. Consensus gene co-expression network analysis

492 In order to construct a gene network, we used the weighted gene co-expression network  
493 analysis algorithm using the WGCNA R package (v1.69) (Langfelder and Horvath 2008). We  
494 used the *voom* transformed data as an input. In order to calibrate the parameters of the  
495 network, we used the approach published by our group (Abbassi-Daloui, Kan et al. 2020).  
496 Briefly, prior knowledge of gene interactions from a pathway database was used to select the  
497 most optimal set of WGCNA parameters. We used the biweight midcorrelation (median-  
498 based) function in WGCNA of the signed hybrid type to define the adjacency matrix. We  
499 performed a full parameter sweep, testing various combinations of settings for power (6, 8,  
500 10, 12, 14, 18, and 22), minClusterSize (15, 20, and 30), deepSplit (0, 2, and 4) and CutHeight  
501 (0.1, 0.15, 0.2, 0.25, and 0.3). These different settings were assessed using the knowledge  
502 network obtained from the Reactome database using g:ProfileR2 R package (v0.2.0) (Kolberg,  
503 Raudvere et al. 2020). All possible pairs of genes were assigned into four different groups: (1)  
504 in the same module and in the same pathway, (2) in the same module but not in the same  
505 pathway, (3) not in the same module but in the same pathway and (4) neither in the same

506 module nor in the same pathway. The enrichment factor  
507  $\left(\frac{\text{No.pairs in group 1} \times \text{No.pairs in group 4}}{\text{No.pairs in group 2} \times \text{No.pairs in group 3}}\right)$  was calculated. The optimal set of parameters with the  
508 highest enrichment factor was: power: 8, MinModuleSize: 20, deepSplit: 0, Cut Height: 0.2.  
509 To identify gene co-expression networks that were consistent across individuals, we  
510 constructed first co-expression networks for each individual separately and merged these  
511 subsequently into a consensus co-expression network. To achieve this, the adjacency  
512 matrices per individual were raised to power 8 and converted into topological overlap  
513 matrices (TOM). TOM of some individuals may be overall lower or higher than TOM of other  
514 individuals. To account for this, we performed percentile (0.95) normalization over all the  
515 TOMs. The consensus TOM was then calculated by taking the elementwise 40th percentile of  
516 the TOMs. The consensus TOM was used to calculate the TOM dissimilarity matrix  
517 ( $\text{dissTOM} = 1 - \text{TOM}$ ) which was then input to agglomerative hierarchical clustering  
518 (Langfelder and Horvath 2012). Finally, modules were identified using a dynamic tree-cutting  
519 algorithm from the resulting dendrogram (Langfelder, Zhang et al. 2008) specifying  
520 MinModuleSize = 20 and deepSplit = 0. The module labeled “grey” was not considered in the  
521 analysis as it consisted of genes that did not assign to any specific module. The summary  
522 expression measure for each module, the module eigengene (ME), was calculated (Zhang and  
523 Horvath 2005). Modules with similar expression profiles were merged at the threshold of 0.2.  
524 In addition, we calculated the intramodular connectivity to identify highly interconnected  
525 genes, called hub genes, per module.

### 526 **7.1. Module-muscle association**

527 To identify modules that differ in expression levels between muscles (named as muscle-  
528 related modules), we fitted linear mixed-effect models on the module eigengenes (MEs) using  
529 the lmer function from the lmerTest R package. These models included individual as a  
530 random-effect and muscle as a fixed-effect, like formula-2. We tested the significance of fixed  
531 effects with ANOVA from the car R package. We used ranova from the lmerTest R package to  
532 test the significance of random effects. To identify significant differences between each pair  
533 of muscles, we used a post-hoc multiple comparison tests as implemented in the lsmeans R  
534 package.

535 We performed a functional enrichment analysis for the muscle-related modules using ClueGO  
536 App (v2.5.7) (Bindea, Mlecnik et al. 2009) in Cytoscape (v3.8.1) (Kohl, Wiese et al. 2011). We  
537 used the CyREST API (Ono, Muetze et al. 2015) to execute the ClueGO by R script  
538 (<http://www.ici.upmc.fr/cluego/cluegoDocumentation.shtml>). Pathways and gene  
539 annotations from Kyoto Encyclopedia of Genes and Genomes (KEGG), Gene Ontology (GO),  
540 Reactome, and WikiPathways (WP) were included. The Benjamini-Hochberg FDR was applied  
541 to adjust for multiple testing. The annotations with any differentially expressed genes or hub  
542 genes or a transcription factor were included. To eliminate the redundant annotations, we  
543 only included an annotation with the lowest FDR for each ‘GoGroups’ defined by ClueGO and  
544 the annotations marked as ‘LeadingGoTerm’ by ClueGO.



545 We next determined muscle-related modules which showed the largest differences between  
546 the three groups of muscles. These modules were selected based on the FDR of GlueGO  
547 enrichment ( $< 0.01$ ) and the F-value of the genes resulting from DEA in each module (third  
548 quantile  $> 5.5$ ).

## 549 8. Immunofluorescence staining, imaging, image analysis

550 The immunofluorescence staining included myofiber typing and capillary staining. Prior to the  
551 staining, slides were allowed to equilibrate to room temperature, blocked for 30 minutes  
552 using 5% milk powder (FrieslandCampina, Amersfoort, The Netherlands) in phosphate-  
553 buffered saline containing 0.05% tween (PBST).

### 554 8.1 Myofiber type composition

#### 555 8.1.1 Myosin staining

556 The antibodies for three myosin heavy chain (MyHC) isoforms (MyHC1, MyHC2A, and  
557 MyHC2X) and laminin were used as described by Riaz, Raz et al. (2016). Briefly, cryosections  
558 were stained with rabbit anti-laminin (1:1000, Sigma-Aldrich, L9393) and mouse anti-6H1  
559 (1:5, DSHB; AB\_2314830) detecting MyHC2X, for two hours at room temperature. Following  
560 the PBST washing, the secondary antibodies goat anti-rabbit-conjugated-Alexa Fluor® 750  
561 (1:1000, Thermo Fisher Scientific, A21039) and goat anti-mouse-conjugated-Alexa Fluor® 488  
562 (1:1000, A11001, Thermo Fisher Scientific) were incubated for an hour at room temperature.  
563 After PBST washing, sections were incubated overnight at four degrees with a mix of  
564 fluorescently conjugated monoclonal antibodies: BA-D5-conjugated-Alexa Fluor® 350 (1:600,  
565 DSHB, AB\_2235587) and SC-71-conjugated-Alexa Fluor® 594 (1:700, DSHB, AB\_2147165),  
566 detecting MyHC1 and MyHC2A, respectively. Lastly, after washing with PBST, the cryosections  
567 were mounted with ProLong™ Gold antifade reagent (P36930, Thermo Fisher Scientific) and  
568 stored at four degrees prior to imaging.

#### 569 8.1.2. Image acquisition, processing, and quantification

570 The stained slides were imaged with the Axio Scan.Z1 slidescanner (Carl Zeiss, Germany) using  
571 the ZEN Blue software (v2.6), capturing the entire section. The images were acquired with a  
572 10×/0.45 Plan-Apochromat objective lens and the same image settings were used for all  
573 slides.

574 After imaging all cryosections, a shading profile was calculated using the ‘Shading Reference  
575 From Tile Image’ in ZEN Lite (v3.3) for each channel in each slide. This procedure produces a  
576 shading profile for each channel per slide and does not apply the shading correction. To  
577 improve the accuracy of the shading profile, we calculated the median over all the shading  
578 profiles over all scanned slides for each channel. These median shading profiles were then  
579 used to perform the shading correction using ‘Shading Correction’ in ZEN Lite (v3.3).

580 Further image processing was performed using Fiji (v 1.51) (Schindelin, Arganda-Carreras et  
581 al. 2012). Since the aggregated dataset is relatively large, we created a modular set of Fiji  
582 macros that process each step independently.

583 First, we converted the slidescanner datasets from the Carl Zeiss Image format (CZI) to  
584 multichannel 16 bit TIFF files using BioFormats (Linkert, Rueden et al. 2010). In this step, the  
585 images were 4x downsampled, by averaging, to improve the processing speed and reduce the  
586 dataset size. After downsampling the effective pixel size was 2.6  $\mu\text{m}$ .

587 Next, we applied a semi-automated process to generate tissue masks from the laminin  
588 channel to determine the (parts of) cryosections to be quantified. To generate masks, we first  
589 used an automated procedure, inspired by ‘ArtefactDetectionOnLaminin’ method from  
590 MuscleJ (Mayeuf-Louchart, Hardy et al. 2018). Subsequently, a manual step was incorporated  
591 to check and correct the generated masks. For each sample, we performed manual  
592 corrections to remove artifacts such as tissue folds, out-of-focus regions, scratch, and dirt  
593 objects.

594 Then, we generated ‘masked’ copies of the laminin channel. To reduce any possible artifacts  
595 due to this binary mask, we applied a gaussian blur of 4 pixels to the masks and we set the  
596 pixel values of the laminin channel that were outside the mask to the median intensity of  
597 these pixels. The masked laminin images were then fed into the *Ilastik* pixel classification  
598 algorithm (Berg, Kutra et al. 2019). In *Ilastik* we trained a classifier to identify two classes:  
599 ‘myofiber boundary’ and ‘not myofiber boundary’. This classifier was then used to process all  
600 images in this dataset. This classification step greatly improved the subsequent laminin  
601 segmentation outputs.

602 Next, the laminin objects were segmented based on the output of the previous step. In short,  
603 the image was slightly blurred with a Gaussian Blur, after which the image was segmented  
604 using the Fiji method “Find Maxima” with output “Segmented Particles”, followed by binary  
605 dilation, and closing. Finally, the regions-of-interest (ROI) (individual laminin segmented  
606 objects) were generated using the ‘Analyze Particle’ method from Fiji.

607 After laminin segmentation, we measured the mean fluorescence intensity (MFI) as well as  
608 other properties in ROIs for all three channels using the Fiji measurement: “Mean gray value”.  
609 In addition, we recorded the “Area”, “Standard deviation”, “Modal gray value”, “Min & max  
610 gray value”, “Shape descriptors”, and “Median” features. We also quantified the results of  
611 the pixel-classification step by measuring its “Mean gray value” in each ROI as well as on the  
612 border (3-pixel enlargement) of each ROI. This quantification allows the assessment of the  
613 myofiber ‘segmentation certainty’, the certainty is high when the pixel-classification is high  
614 for the ‘myofiber boundary’ class all around the myofiber and low in the interior of the  
615 myofiber.

### 616 **8.1.3. Myofiber type composition analysis**

617 First, we filtered out the non-myofiber objects since the laminin segmentation was automatic.  
618 We applied a percentile filtering for a ‘segmentation certainty’ on the cross-sectional area  
619 (CSA) and the circularity values. The objects with **(1)** pixel-classification on the object  
620 boundary less than 5<sup>th</sup> percentile or **(2)** pixel-classification in the interior of the object greater  
621 than 95<sup>th</sup> percentile or **(3)** CSA less than 10<sup>th</sup> percentile or greater than 99<sup>th</sup> percentile or **(4)**  
622 circularity greater than 1<sup>st</sup> percentile were excluded. Samples from different muscles were

623 pooled for all different filtering criteria except for the filtering for CSA, as the density  
624 distributions of CSA were found to differ between different muscles. In the next step, we  
625 selected the cryosection with the largest number of myofibers for each sample for further  
626 analysis. Samples with a minimum of a hundred myofibers were included in the myofiber type  
627 analysis. The final dataset contained 1,287,729 myofibers from 96 samples, with a median of  
628 888 myofibers per sample. As previously described by Raz, van den Akker et al. (2020), per  
629 myofiber, the MFI values for each of three MyHC isoforms were scaled per sample (without  
630 centering). Subsequently, the composition of myofiber types was determined by clustering of  
631 the transformed (natural logarithm) MFI values. Each myofiber was assigned to a cluster using  
632 the mean-shift algorithm (bandwidth ( $h$ ) = 0.02), a density-based clustering approach,  
633 implemented in the LPCM R package (v0.46-7) (Cheng 1995, Einbeck 2011). All the small  
634 clusters, with less than 1% from the total myofibers, were excluded. Then, per myofiber type  
635 cluster, the proportions of the total myofibers were calculated per sample.

## 636 **8.2 Capillary density**

### 637 **8.2.1. Staining and image acquisition**

638 Sections were stained with the primary antibodies: anti-human CD105 (endoglin, ENG) biotin-  
639 conjugated (1:100, BioLegend, 323214), anti-human CD31-Alexa Fluor® 594 conjugated  
640 (1:400, BioLegend, 303126), and rabbit anti-laminin for two hours at room temperature. After  
641 PBST washing, the slides were incubated with streptavidin-Alexa Fluor® 647 conjugated  
642 (1:500, Life Technologies, S21374) and goat anti-rabbit Alexa Fluor® 750-conjugated for an  
643 hour. After final PSBT washing, nuclei were counterstained with 4',6-diamidino-2-  
644 phenylindole (DAPI) (0.5 µg/mL, Sigma-Aldrich) and were mounted with ProLong™ Gold  
645 antifade reagent. Cryosections were imaged with Axio Scan.Z1 slide scanner.

### 646 **8.2.2. Image processing and quantification**

647 We used Fiji macros created for the myofiber composition analysis to convert CZI files to TIFF  
648 files, to generate the masks, and for the laminin segmentation. We then measured the cross-  
649 sectional area for laminin segmented objects using the Fiji “Area” measurement. Next, a  
650 Gaussian Blur filter with an  $\sigma$  value set to 1 was implemented on the CD31 channel, followed  
651 by thresholding using setAutoThreshold (“Li dark” algorithm) and processing using Watershed  
652 algorithm to separate touching and overlapping cells. The lumens were filled using the Fill  
653 Holes algorithm in Fiji. We then measured the properties in ROIs using the Fiji measurements:  
654 “Area”, “Mean gray value”, “Standard deviation”, and “Shape descriptors”. We then  
655 implemented the same processing on the ENG channel to select the ROIs but measured the  
656 “Mean gray value” and “Standard deviation in the CD31 channel to determine the CD31 and  
657 ENG colocalization.

658 For the image quantification, we first calculated the ratio between the total positively stained  
659 areas for CD31 and the total area of the muscle section, expressed as a percentage. We then  
660 determined the capillaries as the objects with (1) positive signals for both CD31 and ENG  
661 (Wehrhan, Stockmann et al. 2011), (2) larger than 3 µm<sup>2</sup> and smaller than 51 µm<sup>2</sup> (Poole,

662 Copp et al. 2013), and (3) circularity larger than 0.5. Finally, we defined capillary density as  
663 the number of capillaries per unit ( $\mu\text{m}^2$ ) of muscle area.

## 664 9. RNAscope *in situ* hybridization

665 We detected single-molecule RNA using Multiplex Fluorescent Reagent Kit v2 (ACDBio,  
666 323135) according to the manufacturer's protocol for fresh-frozen cryosections, with the  
667 following adjustments to optimize the experiment for human muscles: fixation with 4%  
668 paraformaldehyde at 4 degrees for an hour, and all washing steps with washing buffer were  
669 performed three times for two minutes each. The protocol was optimized on control muscle  
670 cryosections by negative and positive probe sets provided by ACDBio. We performed the  
671 hybridization using probes for *Hs-HOXA11* (ACDBio, 1061891-C1), *Hs-HOXA10* (ACDBio,  
672 867141-C2), and *Hs-HOXC10* (ACDBio, 803141-C3). Following the completion of the RNA  
673 probe hybridization, we carried out an immunostaining step at room temperature to label  
674 myofibers with rabbit anti-laminin followed by secondary labeling with goat anti-rabbit-  
675 conjugated-Alexa Fluor® 555 (1:1000, Abcam, ab150078). Lastly, following PBST washing, the  
676 nuclei were counterstained with DAPI (ACDBio, 323110). Cryosections were mounted with  
677 ProLong™ Gold antifade reagent. Slides were imaged with a Leica SP8 confocal microscope,  
678 equipped with a white light laser (WLL) source (Leica Microsystems, Germany) using a 40x/1.3  
679 OIL objective. For each sample, multiple tiles at different regions across the muscle  
680 cryosection were imaged with seven z-planes (z-step size = 0.35  $\mu\text{m}$ ). The images for DAPI and  
681 *HOXA11* channels were acquired using a HyD 2 detector with 414nm-532nm excitation lasers  
682 and with 504nm-543nm excitation lasers, respectively. A HyD 4 detector was used to image  
683 anti-laminin and *HOXA10* channels with 558nm-585nm excitation lasers and with 603nm-  
684 665nm excitation lasers, respectively. A HyD 5 detector was used to image *HOXC10* channel  
685 with 675nm-800nm excitation lasers. The same image settings were used for all samples.

686 We performed the image processing in multiple steps and created a modular set of Fiji macros  
687 that process each step independently. We first merged and converted the Leica Image File  
688 (LIF) to a multichannel 16 bit TIFF file using the Grid/Collection Stitching Plugin (Preibisch,  
689 Saalfeld et al. 2009). We segmented myofibers using the following steps: 1) creating the  
690 maximum intensities projections of the laminin channel, 2) creating 'probability' maps of the  
691 laminin channel in *Ilastik*, 3) adding a point selection to the TIFF files, which seed the  
692 watershed, and 4) implementing watershed segmentation with two halting points for user  
693 interaction, first watershed segmentation and then making the ROI list (individual segmented  
694 myofibers) generated using the 'Analyze Particle' command.

695 After myofiber segmentation, we implemented a Gaussian Blur filter with an  $\sigma$  value set to 1  
696 on each probe channel. We then applied the color threshold settings using setAutoThreshold  
697 ("RenyiEntropy dark" algorithm). Finally, for each probe channel, we measured the foci  
698 properties in each segmented myofiber using the Fiji measurements: "Area", "Mean gray  
699 value", "Standard deviation", and "Shape descriptors".

700 The RNA foci were defined as speckles smaller than 3.5  $\mu\text{m}^2$  with circularity above 0.98. We  
701 excluded *HOXA11* from further analysis due to a low signal-to-noise ratio, agreeing with a

702 lower expression level than *HOXA10* and *HOXC10*. Based on the negative controls, we defined  
703 threshold values to filter out false-positive signals for the 2 other HOX genes. These threshold  
704 values were set such that approximately all the foci in the negative control were classified as  
705 negative. Finally, to compare the expression of two genes between muscles, we calculated  
706 the average number of foci per myofiber per sample.

#### 707 [Availability of data and scripts](#)

708 All scripts are publicly available on GitHub:  
709 [github.com/tabbassidaloi/HumanMuscleTranscriptomeAtlasAnalyses](https://github.com/tabbassidaloi/HumanMuscleTranscriptomeAtlasAnalyses). The raw data is  
710 publicly available at the European Genome Archive (Dataset ID: EGAS00001005904,  
711 <https://ega-archive.org>). Figure 1C and Supplementary Figure S1 show our analyses workflow  
712 used to explore genes contributing to the intrinsic differences between muscles.

#### 713 [Graphical user interface](#)

714 The muscle transcriptomics atlas is available for exploration through a graphical user interface  
715 (<https://tabbassidaloi.shinyapps.io/muscleAtlasShinyApp/>) implemented using shiny, a web  
716 application framework for application shiny R package (v1.5.0)(Chang, Cheng et al. 2020).

#### 717 [Gene network visualization](#)

718 The subnetwork was exported and visualized in Cytoscape (v3.8.1).

#### 719 [Data availability](#)

720 The raw data is publicly available at the European Genome Archive (Dataset ID:  
721 EGAS00001005904, <https://ega-archive.org>). The muscle transcriptomics atlas is available  
722 for exploration through a graphical user interface  
723 (<https://tabbassidaloi.shinyapps.io/muscleAtlasShinyApp/>).

#### 724 [Acknowledgments](#)

725 We thank Susan Kloet, and the personnel from the Leiden genome technology center (LGTC)  
726 in the LUMC for providing the sequencing support.

#### 727 [Funding](#)

728 This project was funded by the Netherlands Organization for Scientific Research (NWO, under  
729 research program VIDI, Grant # 917.164.90) and the Association Française contre les  
730 Myopathies (AFM Telethon; Grant # 22506). We thank the personnel of the Sequence Analysis  
731 Support Core (SASC) in the LUMC for their support in data pre-processing and data submission  
732 at the European Genome Archive.

#### 733 [Conflict of interest](#)

734 The authors declare that they have no conflicts of interest.



## 735 References

- 736 Abbassi-Daloui, T., H. E. Kan, V. Raz and P. A. C. t Hoen (2020). "Recommendations for the  
737 analysis of gene expression data to identify intrinsic differences between similar tissues."  
738 *Genomics* **112**(5): 3157-3165.
- 739 Albayda, J., L. Christopher-Stine, C. O. Bingham Iii, J. J. Paik, E. Tiniakou, S. Billings, O. M. Uy  
740 and P. Burlina (2018). "Pattern of muscle involvement in inclusion body myositis: a  
741 sonographic study." *Clin Exp Rheumatol* **36**(6): 996-1002.
- 742 Anders, S., P. T. Pyl and W. Huber (2015). "HTSeq--a Python framework to work with high-  
743 throughput sequencing data." *Bioinformatics* **31**(2): 166-169.
- 744 Aversa, Z., X. Zhang, R. A. Fielding, I. Lanza and N. K. LeBrasseur (2019). "The clinical impact  
745 and biological mechanisms of skeletal muscle aging." *Bone* **127**: 26-36.
- 746 Berchtold, M. W., H. Brinkmeier and M. Muntener (2000). "Calcium ion in skeletal muscle: its  
747 crucial role for muscle function, plasticity, and disease." *Physiol Rev* **80**(3): 1215-1265.
- 748 Berg, S., D. Kutra, T. Kroeger, C. N. Straehle, B. X. Kausler, C. Haubold, M. Schiegg, J. Ales, T.  
749 Beier, M. Rudy, K. Eren, J. I. Cervantes, B. Xu, F. Beuttenmueller, A. Wolny, C. Zhang, U.  
750 Koethe, F. A. Hamprecht and A. Kreshuk (2019). "ilastik: interactive machine learning for  
751 (bio)image analysis." *Nat Methods* **16**(12): 1226-1232.
- 752 Bergstrom, J. (1975). "Percutaneous needle biopsy of skeletal muscle in physiological and  
753 clinical research." *Scand J Clin Lab Invest* **35**(7): 609-616.
- 754 Bindea, G., B. Mlecnik, H. Hackl, P. Charoentong, M. Tosolini, A. Kirilovsky, W. H. Fridman, F.  
755 Pages, Z. Trajanoski and J. Galon (2009). "ClueGO: a Cytoscape plug-in to decipher functionally  
756 grouped gene ontology and pathway annotation networks." *Bioinformatics* **25**(8): 1091-1093.
- 757 Bindellini, D., L. M. Voortman, C. S. Olie, M. van Putten, E. van den Akker and V. Raz (2021).  
758 "Discovering fiber type architecture over the entire muscle using data-driven analysis."  
759 *Cytometry A* **99**(12): 1240-1249.
- 760 Bottinelli, R., M. A. Pellegrino, M. Canepari, R. Rossi and C. Reggiani (1999). "Specific  
761 contributions of various muscle fibre types to human muscle performance: an in vitro study."  
762 *Journal of Electromyography and Kinesiology* **9**(2): 87-95.
- 763 Brogna, C., L. Cristiano, T. Tartaglione, T. Verdolotti, L. Fanelli, L. Ficociello, G. Tasca, R. Battini,  
764 G. Coratti, N. Forcina, R. De Santis, G. Norcia, S. Carnicella, C. Colosimo, P. Carlier, M. Pane  
765 and E. Mercuri (2018). "Functional levels and MRI patterns of muscle involvement in upper  
766 limbs in Duchenne muscular dystrophy." *PLoS One* **13**(6): e0199222.
- 767 Camic, C. L., A. J. Kovacs, E. A. Enquist, T. A. McLain and E. C. Hill (2015). "Muscle activation of  
768 the quadriceps and hamstrings during incremental running." *Muscle Nerve* **52**(6): 1023-1029.
- 769 Campbell, W. G., S. E. Gordon, C. J. Carlson, J. S. Pattison, M. T. Hamilton and F. W. Booth  
770 (2001). "Differential global gene expression in red and white skeletal muscle." *Am J Physiol*  
771 *Cell Physiol* **280**(4): C763-768.
- 772 Carlier, R. Y., P. Laforet, C. Wary, D. Mompoin, K. Laloui, N. Pellegrini, D. Annane, P. G. Carlier  
773 and D. Orlikowski (2011). "Whole-body muscle MRI in 20 patients suffering from late onset  
774 Pompe disease: Involvement patterns." *Neuromuscul Disord* **21**(11): 791-799.
- 775 Chang, W., J. Cheng, J. J. Allaire, Y. Xie and J. McPherson (2020). shiny: Web Application  
776 Framework for R.
- 777 Cheng, Y. (1995). "Mean Shift, Mode Seeking, and Clustering." *IEEE Trans. Pattern Anal. Mach.*  
778 *Intell.* **17**(8): 790-799.
- 779 De Micheli, A. J., J. A. Spector, O. Elemento and B. D. Cosgrove (2020). "A reference single-cell  
780 transcriptomic atlas of human skeletal muscle tissue reveals bifurcated muscle stem cell  
781 populations." *Skelet Muscle* **10**(1): 19.

782 Diaz-Manera, J., R. Fernandez-Torron, L. L. J. M. K. James, A. Mayhew, F. E. Smith, U. R. Moore,  
783 A. M. Blamire, P. G. Carlier, L. Rufibach, P. Mittal, M. Eagle, M. Jacobs, T. Hodgson, D. Wallace,  
784 L. Ward, M. Smith, R. Stramare, A. Rampado, N. Sato, T. Tamaru, B. Harwick, S. Rico Gala, S.  
785 Turk, E. M. Coppentrath, G. Foster, D. Bendahan, Y. Le Fur, S. T. Fricke, H. Otero, S. L. Foster,  
786 A. Peduto, A. M. Sawyer, H. Hilsden, H. Lochmuller, U. Grieben, S. Spuler, C. Tesi Rocha, J. W.  
787 Day, K. J. Jones, D. X. Bharucha-Goebel, E. Salort-Campana, M. Harms, A. Pestronk, S. Krause,  
788 O. Schreiber-Katz, M. C. Walter, C. Paradas, J. Y. Hogrel, T. Stojkovic, S. Takeda, M. Mori-  
789 Yoshimura, E. Bravver, S. Sparks, L. Bello, C. Semplicini, E. Pegoraro, J. R. Mendell, K. Bushby,  
790 V. Straub and C. O. S. C. Jain (2018). "Muscle MRI in patients with dysferlinopathy: pattern  
791 recognition and implications for clinical trials." *J Neurol Neurosurg Psychiatry* **89**(10): 1071-  
792 1081.

793 Diogo, R., N. Siomava and Y. Gitton (2019). "Development of human limb muscles based on  
794 whole-mount immunostaining and the links between ontogeny and evolution." *Development*  
795 **146**(20).

796 Dobin, A., C. A. Davis, F. Schlesinger, J. Drenkow, C. Zaleski, S. Jha, P. Batut, M. Chaisson and  
797 T. R. Gingeras (2013). "STAR: ultrafast universal RNA-seq aligner." *Bioinformatics* **29**(1): 15-  
798 21.

799 Einbeck, J. (2011). "Bandwidth Selection for Mean-shift based Unsupervised Learning  
800 Techniques: a Unified Approach via Self-coverage." *Journal of Pattern Recognition Research*  
801 **6**(2): 175-192.

802 Emery, A. E. (2002). "The muscular dystrophies." *Lancet* **359**(9307): 687-695.

803 Fox, J. and S. Weisberg (2019). *An R companion to applied regression*. Los Angeles, SAGE.

804 Gouspillou, G., N. Sgarioto, B. Norris, S. Barbat-Artigas, M. Aubertin-Leheudre, J. A. Morais, Y.  
805 Burelle, T. Taivassalo and R. T. Hepple (2014). "The relationship between muscle fiber type-  
806 specific PGC-1alpha content and mitochondrial content varies between rodent models and  
807 humans." *PLoS One* **9**(8): e103044.

808 Greenbaum, D., C. Colangelo, K. Williams and M. Gerstein (2003). "Comparing protein  
809 abundance and mRNA expression levels on a genomic scale." *Genome Biol* **4**(9): 117.

810 Haslett, J. N., P. B. Kang, M. Han, A. T. Kho, D. Sanoudou, J. M. Volinski, A. H. Beggs, I. S. Kohane  
811 and L. M. Kunkel (2005). "The influence of muscle type and dystrophin deficiency on murine  
812 expression profiles." *Mamm Genome* **16**(10): 739-748.

813 Hettige, P., U. Tahir, K. C. Nishikawa and M. J. Gage (2020). "Comparative analysis of the  
814 transcriptomes of EDL, psoas, and soleus muscles from mice." *BMC Genomics* **21**(1): 808.

815 Hooijmans, M. T., E. H. Niks, J. Burakiewicz, C. Anastasopoulos, S. I. van den Berg, E. van Zwet,  
816 A. G. Webb, J. Verschuuren and H. E. Kan (2017). "Non-uniform muscle fat replacement along  
817 the proximodistal axis in Duchenne muscular dystrophy." *Neuromuscul Disord* **27**(5): 458-464.

818 Houghton, L. and N. Rosenthal (1999). "Regulation of a muscle-specific transgene by  
819 persistent expression of Hox genes in postnatal murine limb muscle." *Dev Dyn* **216**(4-5): 385-  
820 397.

821 Huovinen, S., S. Penttila, P. Somervuo, J. Keto, P. Auvinen, A. Vihola, S. Huovinen, K. Pelin, O.  
822 Raheem, J. Salenius, T. Suominen, P. Hackman and B. Udd (2015). "Differential isoform  
823 expression and selective muscle involvement in muscular dystrophies." *Am J Pathol* **185**(10):  
824 2833-2842.

825 Johnson, M. A., J. Polgar, D. Weightman and D. Appleton (1973). "Data on the distribution of  
826 fibre types in thirty-six human muscles. An autopsy study." *J Neurol Sci* **18**(1): 111-129.

827 Kang, P. B., A. T. Kho, D. Sanoudou, J. N. Haslett, C. P. Dow, M. Han, J. M. Blasko, H. G. Lidov,  
828 A. H. Beggs and L. M. Kunkel (2005). "Variations in gene expression among different types of  
829 human skeletal muscle." Muscle Nerve **32**(4): 483-491.

830 Kendal, A., T. Layton, H. Al-Mossawi, R. Brown, C. Loizou, M. Rogers, M. Sharp, S. Dakin, L.  
831 Appleton and A. Carr (2019). "Identification of human tendon cell populations in healthy and  
832 diseased tissue using combined single cell transcriptomics and proteomics." bioRxiv:  
833 2019.2012.2009.869933.

834 Kohl, M., S. Wiese and B. Warscheid (2011). "Cytoscape: software for visualization and  
835 analysis of biological networks." Methods Mol Biol **696**: 291-303.

836 Kolberg, L., U. Raudvere, I. Kuzmin, J. Vilo and H. Peterson (2020). "gprofiler2 -- an R package  
837 for gene list functional enrichment analysis and namespace conversion toolset g:Profiler." F1000Res **9**.

839 Korthuis, R. J. (2011). Anatomy of Skeletal Muscle and Its Vascular Circulation. San Rafael (CA).

841 Kuznetsova, A., P. B. Brockhoff and R. H. B. Christensen (2017). "lmerTest Package: Tests in  
842 Linear Mixed Effects Models." Journal of Statistical Software **82**(13): 1-26.

843 Langfelder, P. and S. Horvath (2008). "WGCNA: an R package for weighted correlation  
844 network analysis." BMC Bioinformatics **9**: 559.

845 Langfelder, P. and S. Horvath (2012). "Fast R Functions for Robust Correlations and  
846 Hierarchical Clustering." J Stat Softw **46**(11).

847 Langfelder, P., B. Zhang and S. Horvath (2008). "Defining clusters from a hierarchical cluster  
848 tree: the Dynamic Tree Cut package for R." Bioinformatics **24**(5): 719-720.

849 Law, C. W., Y. Chen, W. Shi and G. K. Smyth (2014). "voom: Precision weights unlock linear  
850 model analysis tools for RNA-seq read counts." Genome Biol **15**(2): R29.

851 Lenth, R. V. (2016). "Least-Squares Means: The R Package lsmeans." Journal of Statistical  
852 Software **69**(1): 1-33.

853 Linkert, M., C. T. Rueden, C. Allan, J. M. Burel, W. Moore, A. Patterson, B. Loranger, J. Moore,  
854 C. Neves, D. Macdonald, A. Tarkowska, C. Sticco, E. Hill, M. Rossner, K. W. Eliceiri and J. R.  
855 Swedlow (2010). "Metadata matters: access to image data in the real world." J Cell Biol **189**(5):  
856 777-782.

857 Liu, Y., A. Beyer and R. Aebersold (2016). "On the Dependency of Cellular Protein Levels on  
858 mRNA Abundance." Cell **165**(3): 535-550.

859 Martin, M. (2011). "Cutadapt removes adapter sequences from high-throughput sequencing  
860 reads." 2011 **17**(1): 3.

861 Mayeuf-Louchart, A., D. Hardy, Q. Thorel, P. Roux, L. Gueniot, D. Briand, A. Mazeraud, A.  
862 Bougle, S. L. Shorte, B. Staels, F. Chretien, H. Duez and A. Danckaert (2018). "MuscleJ: a high-  
863 content analysis method to study skeletal muscle with a new Fiji tool." Skelet Muscle **8**(1): 25.

864 McCormick, R. and A. Vasilaki (2018). "Age-related changes in skeletal muscle: changes to life-  
865 style as a therapy." Biogerontology **19**(6): 519-536.

866 McKenna, A., M. Hanna, E. Banks, A. Sivachenko, K. Cibulskis, A. Kernytsky, K. Garimella, D.  
867 Altshuler, S. Gabriel, M. Daly and M. A. DePristo (2010). "The Genome Analysis Toolkit: a  
868 MapReduce framework for analyzing next-generation DNA sequencing data." Genome Res  
869 **20**(9): 1297-1303.

870 Murakami, S., H. Fujino, I. Takeda, R. Momota, K. Kumagishi and A. Ohtsuka (2010).  
871 "Comparison of capillary architecture between slow and fast muscles in rats using a confocal  
872 laser scanning microscope." Acta Med Okayama **64**(1): 11-18.

873 Nishiyama, A. (1965). "Histochemical studies on the red, white and intermediate muscle fibers  
874 of some skeletal muscles. II. The capillary distribution on three types of fibers of some skeletal  
875 muscles." *Acta Med Okayama* **19**(4): 191-198.

876 Ono, K., T. Muetze, G. Kolishovski, P. Shannon and B. Demchak (2015). "CyREST:  
877 Turbocharging Cytoscape Access for External Tools via a RESTful API." *F1000Res* **4**: 478.

878 Orchard, P., N. Manickam, C. Ventresca, S. Vadlamudi, A. Varshney, V. Rai, J. Kaplan, C.  
879 Lalancette, K. L. Mohlke, K. Gallagher, C. F. Burant and S. C. J. Parker (2021). "Human and rat  
880 skeletal muscle single-nuclei multi-omic integrative analyses nominate causal cell types,  
881 regulatory elements, and SNPs for complex traits." *Genome Res*.

882 Perez, K., J. McGirr, C. Limbad, R. Doi, J. P. Nederveen, M. I. Nilsson, M. Tarnopolsky, J. Campisi  
883 and S. Melov (2021). "Single nuclei profiling identifies cell specific markers of skeletal muscle  
884 aging, sarcopenia and senescence." *medRxiv*: 2021.2001.2022.21250336.

885 Perucca Orfei, C., M. Viganò, J. R. Pearson, A. Colombini, P. De Luca, E. Ragni, L. Santos-Ruiz  
886 and L. De Girolamo (2019). "In Vitro Induction of Tendon-Specific Markers in Tendon Cells,  
887 Adipose- and Bone Marrow-Derived Stem Cells is Dependent on TGFβ3, BMP-12 and Ascorbic  
888 Acid Stimulation." *International Journal of Molecular Sciences* **20**(1): 149.

889 Poole, D. C., S. W. Copp, S. K. Ferguson and T. I. Musch (2013). "Skeletal muscle capillary  
890 function: contemporary observations and novel hypotheses." *Exp Physiol* **98**(12): 1645-1658.

891 Porter, J. D., S. Khanna, H. J. Kaminski, J. S. Rao, A. P. Merriam, C. R. Richmonds, P. Leahy, J. Li  
892 and F. H. Andrade (2001). "Extraocular muscle is defined by a fundamentally distinct gene  
893 expression profile." *Proc Natl Acad Sci U S A* **98**(21): 12062-12067.

894 Preibisch, S., S. Saalfeld and P. Tomancak (2009). "Globally optimal stitching of tiled 3D  
895 microscopic image acquisitions." *Bioinformatics* **25**(11): 1463-1465.

896 R-Core-Team (2020). R: A Language and Environment for Statistical Computing.

897 Rahimov, F., O. D. King, D. G. Leung, G. M. Bibat, C. P. Emerson, Jr., L. M. Kunkel and K. R.  
898 Wagner (2012). "Transcriptional profiling in facioscapulohumeral muscular dystrophy to  
899 identify candidate biomarkers." *Proc Natl Acad Sci U S A* **109**(40): 16234-16239.

900 Raz, V., M. Riaz, Z. Tatum, S. M. Kielbasa and P. A. C. t Hoen (2018). "The distinct  
901 transcriptomes of slow and fast adult muscles are delineated by noncoding RNAs." *FASEB J*  
902 **32**(3): 1579-1590.

903 Raz, Y., J. F. Henseler, A. Kolk, M. Riaz, P. van der Zwaal, J. Nagels, R. G. Nelissen and V. Raz  
904 (2015). "Patterns of Age-Associated Degeneration Differ in Shoulder Muscles." *Front Aging*  
905 *Neurosci* **7**: 236.

906 Raz, Y., J. F. Henseler, A. Kolk, Z. Tatum, N. K. Groosjohan, N. E. Verwey, W. Arindrarto, S. M.  
907 Kielbasa, J. Nagels, P. A. t Hoen, R. G. Nelissen and V. Raz (2016). "Molecular signatures of  
908 age-associated chronic degeneration of shoulder muscles." *Oncotarget* **7**(8): 8513-8523.

909 Raz, Y., E. B. van den Akker, T. Roest, M. Riaz, O. van de Rest, H. E. D. Suchiman, N. Lakenberg,  
910 S. A. Stassen, M. van Putten, E. J. M. Feskens, M. J. T. Reinders, J. Goeman, M. Beekman, V.  
911 Raz and P. E. Slagboom (2020). "A data-driven methodology reveals novel myofiber clusters  
912 in older human muscles." *FASEB J* **34**(4): 5525-5537.

913 Riaz, M., Y. Raz, M. van Putten, G. Paniagua-Soriano, Y. D. Krom, B. I. Florea and V. Raz (2016).  
914 "PABPN1-Dependent mRNA Processing Induces Muscle Wasting." *PLoS Genet* **12**(5):  
915 e1006031.

916 Ritchie, M. E., B. Phipson, D. Wu, Y. Hu, C. W. Law, W. Shi and G. K. Smyth (2015). "limma  
917 powers differential expression analyses for RNA-sequencing and microarray studies." *Nucleic*  
918 *Acids Res* **43**(7): e47.



- 919 Robinson, M. D., D. J. McCarthy and G. K. Smyth (2010). "edgeR: a Bioconductor package for  
920 differential expression analysis of digital gene expression data." Bioinformatics **26**(1): 139-  
921 140.
- 922 RStudio-Team (2020). RStudio: Integrated Development Environment for R.
- 923 Rubenstein, A. B., G. R. Smith, U. Raue, G. Begue, K. Minchev, F. Ruf-Zamojski, V. D. Nair, X.  
924 Wang, L. Zhou, E. Zaslavsky, T. A. Trappe, S. Trappe and S. C. Sealfon (2020). "Single-cell  
925 transcriptional profiles in human skeletal muscle." Sci Rep **10**(1): 229.
- 926 Schindelin, J., I. Arganda-Carreras, E. Frise, V. Kaynig, M. Longair, T. Pietzsch, S. Preibisch, C.  
927 Rueden, S. Saalfeld, B. Schmid, J. Y. Tinevez, D. J. White, V. Hartenstein, K. Eliceiri, P. Tomancak  
928 and A. Cardona (2012). "Fiji: an open-source platform for biological-image analysis." Nat  
929 Methods **9**(7): 676-682.
- 930 Servian-Morilla, E., M. Cabrera-Serrano, K. Johnson, A. Pandey, A. Ito, E. Rivas, T. Chamova,  
931 N. Muelas, T. Mongini, S. Nafissi, K. G. Claeys, R. P. Grewal, M. Takeuchi, H. Hao, C.  
932 Bonnemann, O. Lopes Abath Neto, L. Medne, J. Brandsema, A. Topf, A. Taneva, J. J. Vilchez, I.  
933 Tournev, R. S. Haltiwanger, H. Takeuchi, H. Jafar-Nejad, V. Straub and C. Paradas (2020).  
934 "POGLUT1 biallelic mutations cause myopathy with reduced satellite cells, alpha-dystroglycan  
935 hypoglycosylation and a distinctive radiological pattern." Acta Neuropathol **139**(3): 565-582.
- 936 Smith, L. R., G. Meyer and R. L. Lieber (2013). "Systems analysis of biological networks in  
937 skeletal muscle function." Wiley Interdiscip Rev Syst Biol Med **5**(1): 55-71.
- 938 Smith, T., A. Heger and I. Sudbery (2017). "UMI-tools: modeling sequencing errors in Unique  
939 Molecular Identifiers to improve quantification accuracy." Genome Res **27**(3): 491-499.
- 940 Terry, E. E., X. Zhang, C. Hoffmann, L. D. Hughes, S. A. Lewis, J. Li, M. J. Wallace, L. A. Riley, C.  
941 M. Douglas, M. A. Gutierrez-Monreal, N. F. Lahens, M. C. Gong, F. Andrade, K. A. Esser and M.  
942 E. Hughes (2018). "Transcriptional profiling reveals extraordinary diversity among skeletal  
943 muscle tissues." Elife **7**.
- 944 Tey, S. R., S. Robertson, E. Lynch and M. Suzuki (2019). "Coding Cell Identity of Human Skeletal  
945 Muscle Progenitor Cells Using Cell Surface Markers: Current Status and Remaining Challenges  
946 for Characterization and Isolation." Front Cell Dev Biol **7**: 284.
- 947 Valentine, B. A. (2017). "Skeletal Muscle." Pathologic Basis of Veterinary Disease: 908-  
948 953.e901.
- 949 van Putten, M., E. M. Lloyd, J. C. de Greef, V. Raz, R. Willmann and M. D. Grounds (2020).  
950 "Mouse models for muscular dystrophies: an overview." Dis Model Mech **13**(2).
- 951 Veeger, T. T. J., E. W. van Zwet, D. Al Mohamad, K. J. Naarding, N. M. van de Velde, M. T.  
952 Hooijmans, A. G. Webb, E. H. Niks, J. H. de Groot and H. E. Kan (2021). "Muscle architecture  
953 is associated with muscle fat replacement in Duchenne and Becker muscular dystrophies."  
954 Muscle Nerve **64**(5): 576-584.
- 955 von der Hagen, M., S. H. Laval, L. M. Cree, F. Haldane, M. Pocock, I. Wappler, H. Peters, H. A.  
956 Reitsamer, H. Hoger, M. Wiedner, F. Oberndorfer, L. V. Anderson, V. Straub, R. E. Bittner and  
957 K. M. Bushby (2005). "The differential gene expression profiles of proximal and distal muscle  
958 groups are altered in pre-pathological dysferlin-deficient mice." Neuromuscul Disord **15**(12):  
959 863-877.
- 960 Wehrhan, F., P. Stockmann, E. Nkenke, K. A. Schlegel, A. Guentsch, T. Wehrhan, F. W. Neukam  
961 and K. Amann (2011). "Differential impairment of vascularization and angiogenesis in  
962 bisphosphonate-associated osteonecrosis of the jaw-related mucoperiosteal tissue." Oral  
963 Surg Oral Med Oral Pathol Oral Radiol Endod **112**(2): 216-221.



964 Willigenburg, N. W., M. P. McNally and T. E. Hewett (2014). Quadriceps and Hamstrings  
965 Strength in Athletes. Hamstring and Quadriceps Injuries in Athletes: A Clinical Guide. C. C.  
966 Kaeding and J. R. Borchers. Boston, MA, Springer US: 15-28.

967 Wokke, B. H., J. C. van den Bergen, M. J. Versluis, E. H. Niks, J. Milles, A. G. Webb, E. W. van  
968 Zwet, A. Aartsma-Rus, J. J. Verschuuren and H. E. Kan (2014). "Quantitative MRI and strength  
969 measurements in the assessment of muscle quality in Duchenne muscular dystrophy."  
970 Neuromuscul Disord **24**(5): 409-416.

971 Xi, H., J. Langerman, S. Sabri, P. Chien, C. S. Young, S. Younesi, M. Hicks, K. Gonzalez, W.  
972 Fujiwara, J. Marzi, S. Liebscher, M. Spencer, B. Van Handel, D. Evseenko, K. Schenke-Layland,  
973 K. Plath and A. D. Pyle (2020). "A Human Skeletal Muscle Atlas Identifies the Trajectories of  
974 Stem and Progenitor Cells across Development and from Human Pluripotent Stem Cells." Cell  
975 Stem Cell **27**(1): 158-176 e110.

976 Yoshioka, K., H. Nagahisa, F. Miura, H. Araki, Y. Kamei, Y. Kitajima, D. Seko, J. Nogami, Y.  
977 Tsuchiya, N. Okazaki, A. Yonekura, S. Ohba, Y. Sumita, K. Chiba, K. Ito, I. Asahina, Y. Ogawa, T.  
978 Ito, Y. Ohkawa and Y. Ono (2021). "Hoxa10 mediates positional memory to govern stem cell  
979 function in adult skeletal muscle." Sci Adv **7**(24).

980 Yousefi, S., T. Abbassi-Daloui, T. Kraaijenbrink, M. Vermaat, H. Mei, P. van 't Hof, M. van  
981 Iterson, D. V. Zhernakova, A. Claringbould, L. Franke, L. M. t Hart, R. C. Slieker, A. van der  
982 Heijden, P. de Knijff, B. consortium and P. A. C. t Hoen (2018). "A SNP panel for identification  
983 of DNA and RNA specimens." BMC Genomics **19**(1): 90.

984 Zakany, J. and D. Duboule (2007). "The role of Hox genes during vertebrate limb  
985 development." Curr Opin Genet Dev **17**(4): 359-366.

986 Zhang, B. and S. Horvath (2005). "A general framework for weighted gene co-expression  
987 network analysis." Stat Appl Genet Mol Biol **4**: Article17.

988 Zhang, Y., G. Parmigiani and W. E. Johnson (2020). "ComBat-seq: batch effect adjustment for  
989 RNA-seq count data." NAR Genom Bioinform **2**(3): lqaa078.

990 **Table 1.** Top enrichment results of muscle-related modules not driven by cell type composition

| Module                                                      | Term                                                                    | FDR                  | #Enriched genes | Hub genes                                                                                                                       |
|-------------------------------------------------------------|-------------------------------------------------------------------------|----------------------|-----------------|---------------------------------------------------------------------------------------------------------------------------------|
| <b>Higher expression in G1 (GR, STM, and STD)</b>           |                                                                         |                      |                 |                                                                                                                                 |
| M.30 (75 genes)                                             | IRE1-mediated unfolded protein response                                 | $4 \times 10^{-4}$   | 4               |                                                                                                                                 |
| M.32 (236 genes)                                            | Hormone-mediated signaling pathway                                      | $9 \times 10^{-3}$   | 11              | <i>CARM1, WBP2, ZBTB7A</i>                                                                                                      |
| M.7 (308 genes)                                             | Negative regulation of nucleobase-containing compound metabolic process | $6 \times 10^{-4}$   | 51              | <i>CREBBP, DAB2IP, FOXK2, LARP1, RXRA, THRA</i>                                                                                 |
|                                                             | Chromatin organization                                                  | $1 \times 10^{-2}$   | 27              | <i>ARID1B, CREBBP, HUWE1</i>                                                                                                    |
| M.17 (176 genes)                                            | Chromatin modifying enzymes                                             | $4 \times 10^{-3}$   | 11              | <i>HCFC1, SETD1A</i>                                                                                                            |
| <b>Higher expression in G2 (RF, VL, and VM) and G3 (GL)</b> |                                                                         |                      |                 |                                                                                                                                 |
| M.31 (945 genes)                                            | RNA splicing                                                            | $6 \times 10^{-5}$   | 54              | <i>SNRNP70</i>                                                                                                                  |
|                                                             | Histone modification                                                    | $3 \times 10^{-3}$   | 47              | <i>KAT2A</i>                                                                                                                    |
| M.33 (538 genes)                                            | Apical junction complex                                                 | $2.4 \times 10^{-2}$ | 11              | <i>MICALL2</i>                                                                                                                  |
| M.13 (300 genes)                                            | Mitochondrion                                                           | $4 \times 10^{-45}$  | 122             | <i>AIFM1, ATP5F1A, ATP5F1B, CKMT2, COQ9, DLD, DLST, FH, GHITM, HADHA, HADHB, IMMT, MFN2, NDUFS2, PDHA1, PDHB, TRAP1, UQCRC2</i> |
| M.14 (162 genes)                                            | Anterior/posterior pattern specification                                | $4 \times 10^{-3}$   | 7               | <i>HOXA11</i>                                                                                                                   |
| <b>Higher expression in G3 (GL)</b>                         |                                                                         |                      |                 |                                                                                                                                 |
| M.5 (190 genes)                                             | Regulation of lipid metabolic process                                   | $8 \times 10^{-4}$   | 15              | <i>ADIPOQ, ADRA2A, CIDEA, LEP, LGALS12, PDE3B, SCD</i>                                                                          |
| M.25 (188 genes)                                            | Ameboidal-type cell migration                                           | $5 \times 10^{-3}$   | 15              | <i>CFL1, PML, TGFB1</i>                                                                                                         |
|                                                             | Positive regulation of muscle cell differentiation                      | $9 \times 10^{-3}$   | 6               | <i>EHD2, ENG, NIBAN2, TGFB1</i>                                                                                                 |
| M.11 (299 genes)                                            | Golgi membrane                                                          | $2 \times 10^{-3}$   | 30              | <i>ASAP2, MAN1A1</i>                                                                                                            |
|                                                             | Regulation of nervous system development                                | $8 \times 10^{-3}$   | 30              | <i>IQGAP1</i>                                                                                                                   |

991

992

993 **Figures**

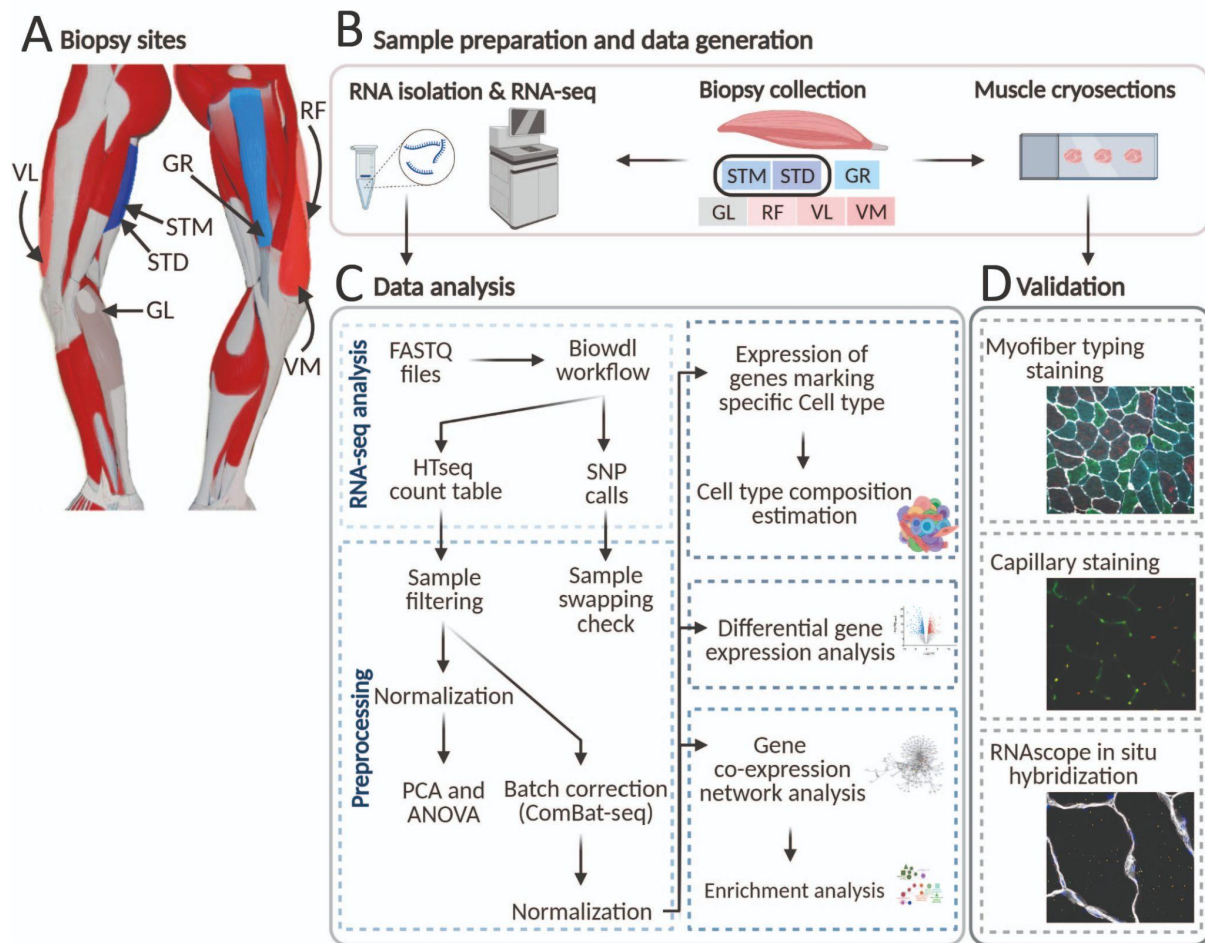

994

995

996

997

998

999

**Figure 1. An overview of biopsies' location and the study workflow.** A) A schematic overview of the leg muscles. Arrows point to the muscles that were included in this study. The biopsies, with exception of STM (semitendinosus-middle), were taken from the distal area. B-D) The study overview includes cryosectioning, RNA-isolation and sequencing (B) data analysis (C) and validations (D).

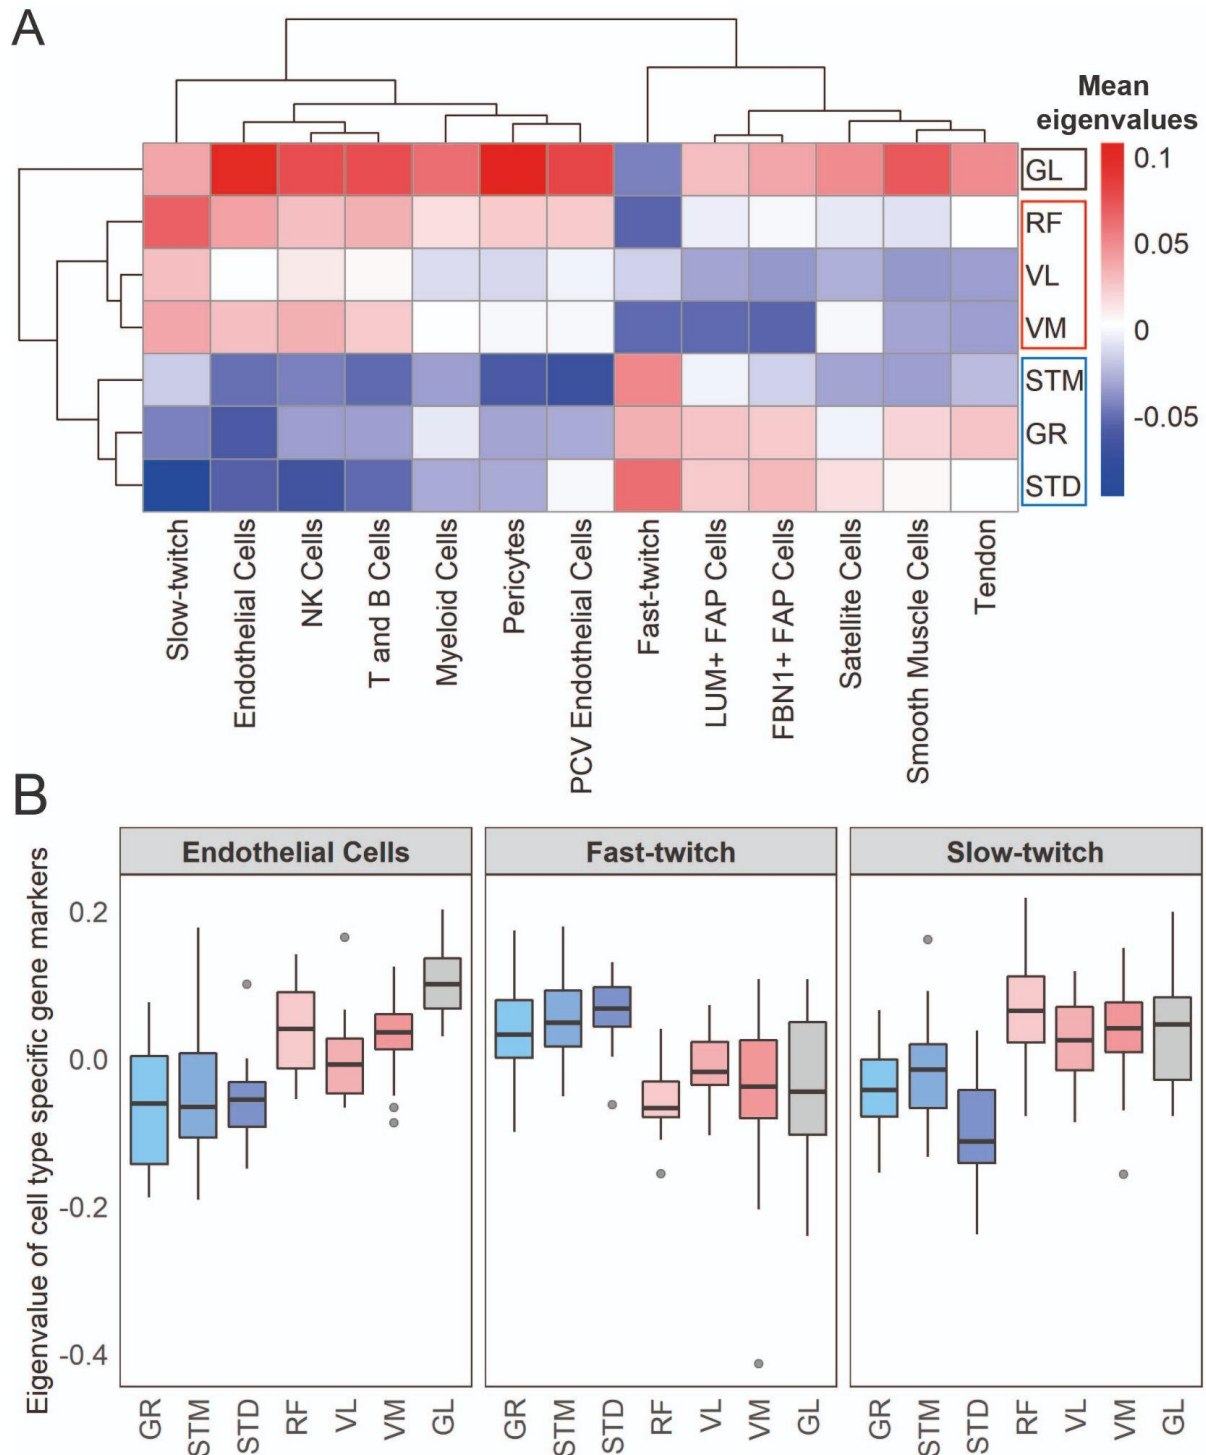

1000  
1001  
1002  
1003  
1004  
1005

**Figure 2. Muscles cluster into three main groups based on cell type composition. A)** The heatmap shows the mean eigenvalues of genes marking each cell type across all the individuals. Each row shows a muscle, and each column shows a cell type. FAB stands for fibro-adipogenic progenitors. **B)** The boxplot shows the eigenvalues for the endothelial cells, fast-twitch, and slow-twitch myofibers per muscle. The boxes reflect the median and interquartile range.

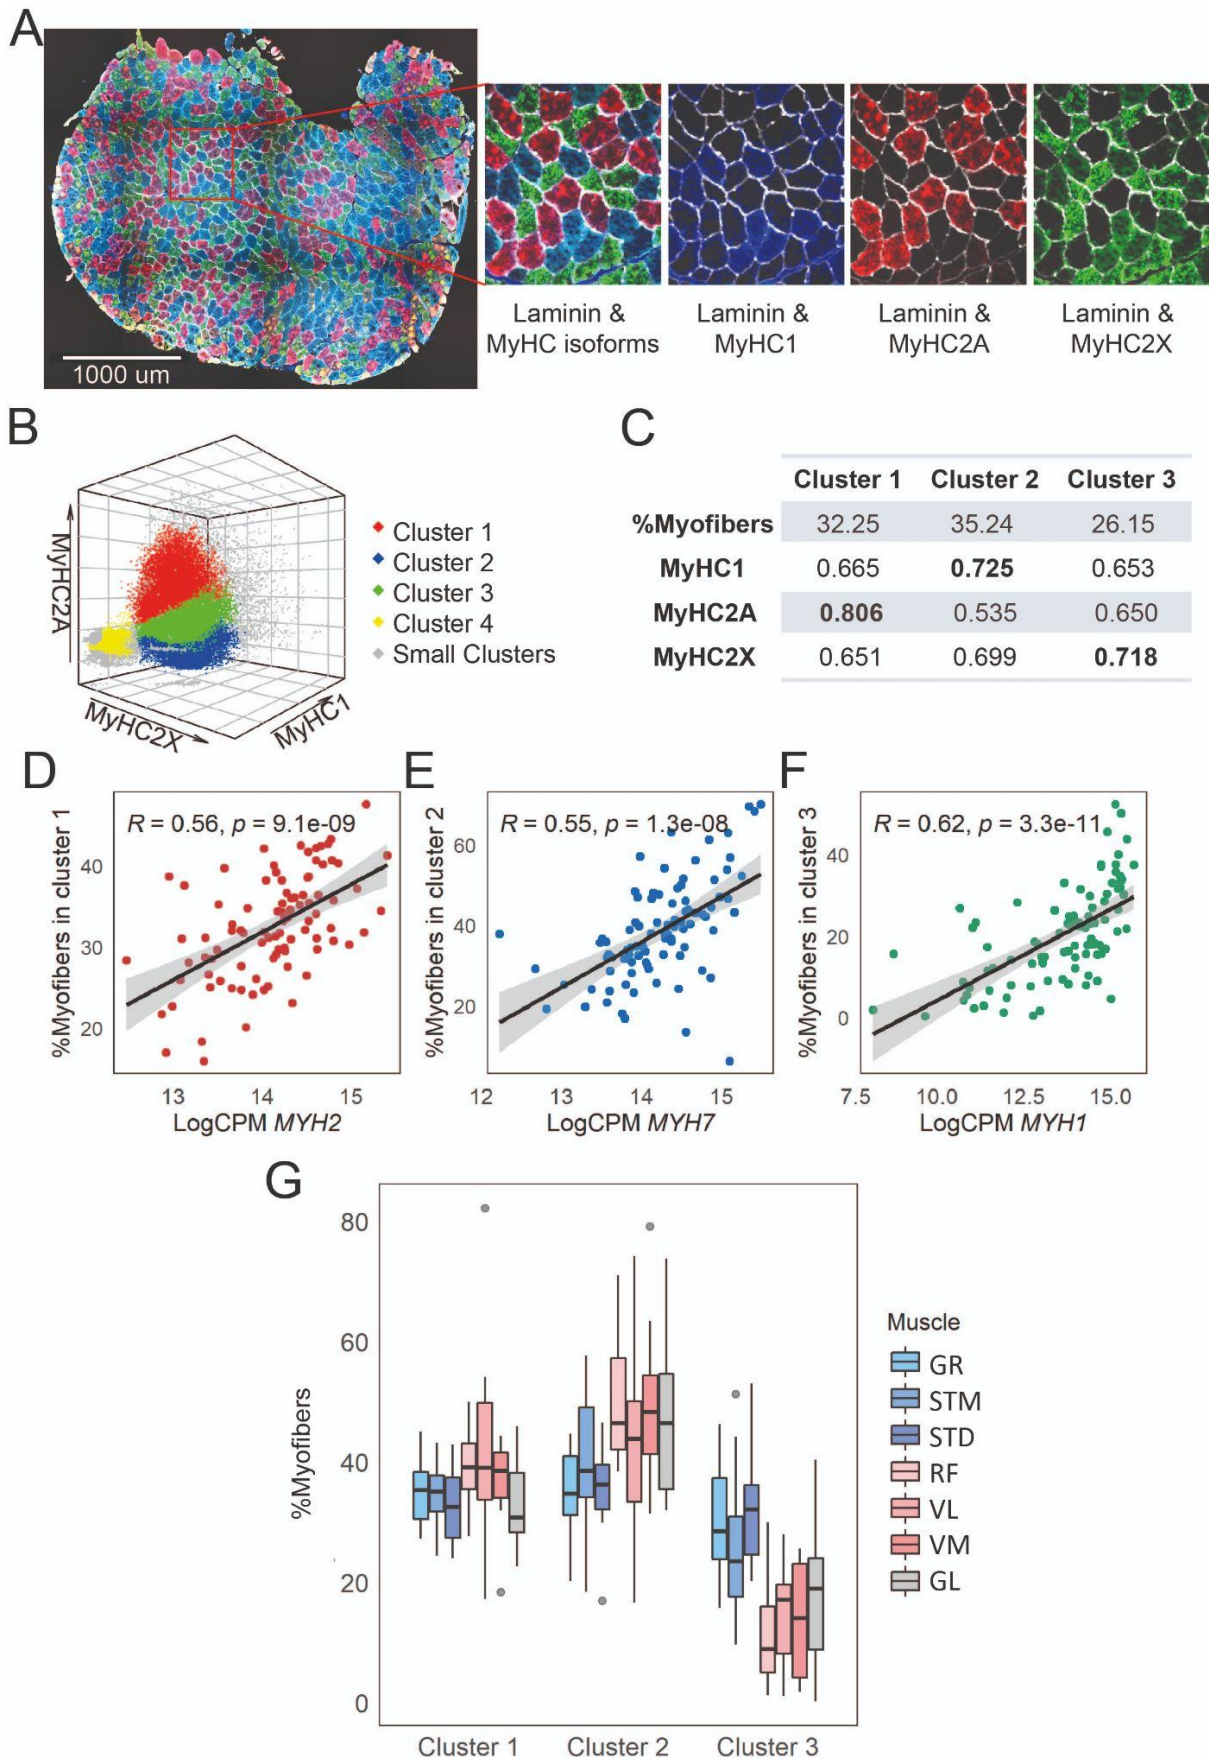



1007 **Figure 3. Myofiber type composition is consistent with the expression level of genes marking fast**  
1008 **and slow-twitch myofibers. A)** A representative immunostaining image. The overlay of each myosin  
1009 heavy chain isoform and laminin are shown separately. **B)** The MFI of the three MyHC isoforms are  
1010 plotted in 3-D. Each dot represents a myofiber. Myofibers in the three largest clusters are denoted  
1011 with red (Cluster 1), blue (Cluster 2), and green (Cluster 3). The objects with low MFI values for all the  
1012 isoforms are denoted in yellow (Cluster 4, ~2% of all the dots). In gray are ~4% of myofibers assigned  
1013 to many small clusters. **C)** The table shows the proportion of myofibers assigned to each of the three  
1014 largest clusters and the average MFI values for each isoform. **D-F)** Scatterplots show the proportion of  
1015 the assigned myofibers to each of the largest clusters and the normalized expression of the gene  
1016 coding the isoform with a relatively higher expression in that specific myofiber cluster. **G)** The boxplot  
1017 shows the proportion of myofibers in the three largest clusters per muscle. Each muscle is depicted  
1018 with a different color, with G1 muscles in blue, G2 muscles in red and the G3 muscle in grey. The boxes  
1019 reflect the median and interquartile range.

1020

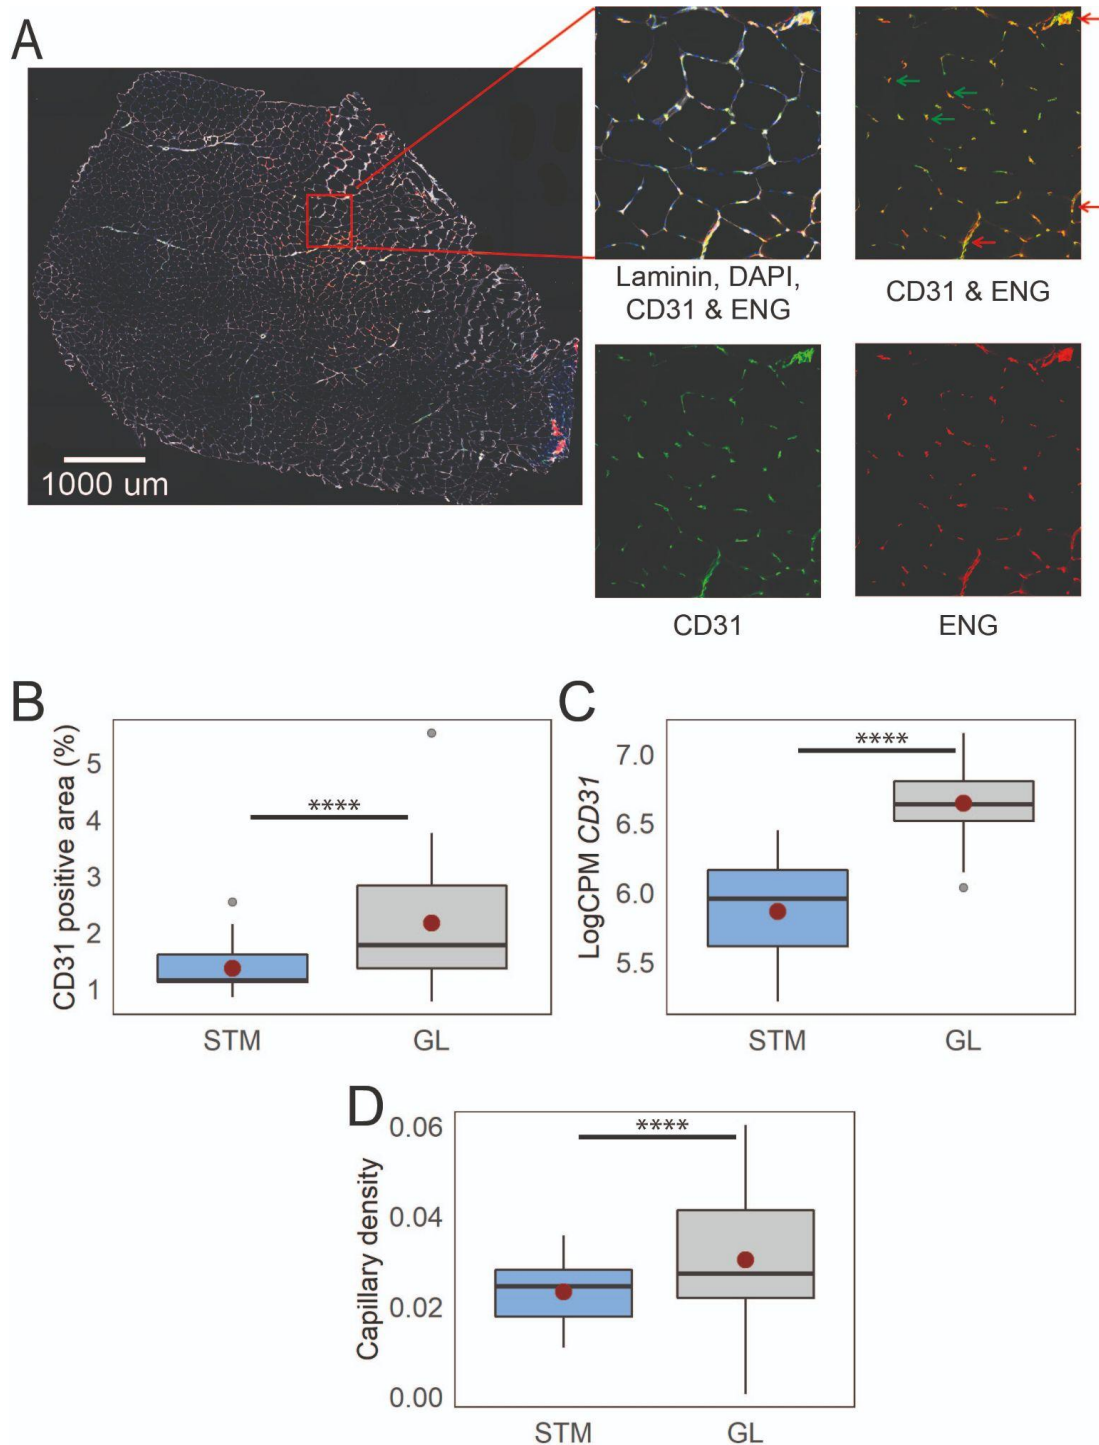

1021

1022 **Figure 4. Immunostaining confirms higher capillary density in GL compared with STM muscles.** **A)** A  
1023 representative muscle cross section image immunostained with CD31, ENG, and laminin. An  
1024 enlargement of the boxed region is shown on the right, with images of the three separate channels  
1025 and an overlay. Examples of objects recognized as capillaries are shown by green arrows. Some  
1026 examples of objects that were not considered as capillaries are shown by red arrows. **B)** The box plot  
1027 shows the percentage of CD31 positive area in the two muscles. **C)** The box plot shows the normalized  
1028 expression of *CD31* gene in the two muscles. **D)** The boxplot shows the estimated capillary density in  
1029 the two muscles. The capillary density was defined as the number of objects (3-51  $\mu\text{m}^2$ ) with an  
1030 overlap between CD31 and ENG per unit cross-sectional area of the muscle. The boxes reflect the

1031 median and interquartile range (N = 19 per muscle). The red dots on the boxes show the mean. \*\*\*\*

1032 *P-value* <  $1 \times 10^{-6}$  (linear mixed-model).

1033



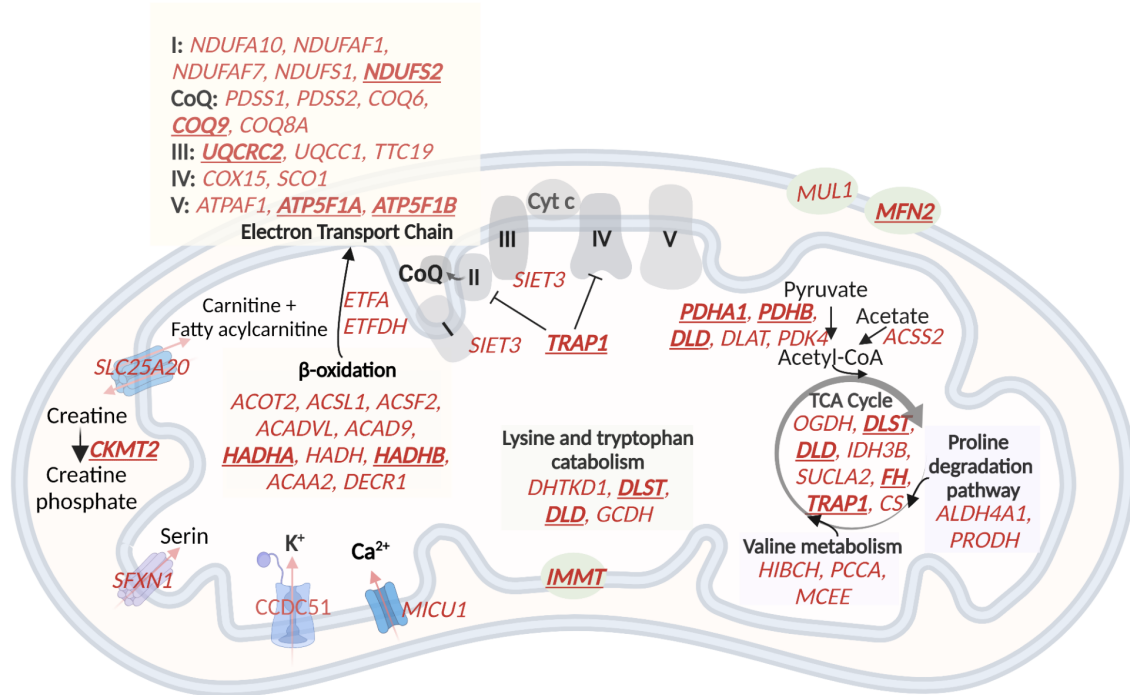

1048

1049

1050

1051

1052

1053

1054

**Figure 6. A schematic representation of genes with higher expression in G2 and G3, related to oxidative phosphorylation and metabolic pathways in the mitochondria.** 60 (out of the 122) mitochondrial genes with higher expression in G2 and G3 are shown in red. The electron transport chain, lysin and tryptophan catabolism, TCA cycle, and beta-oxidation are shown. The hub genes are underlined and in bold.



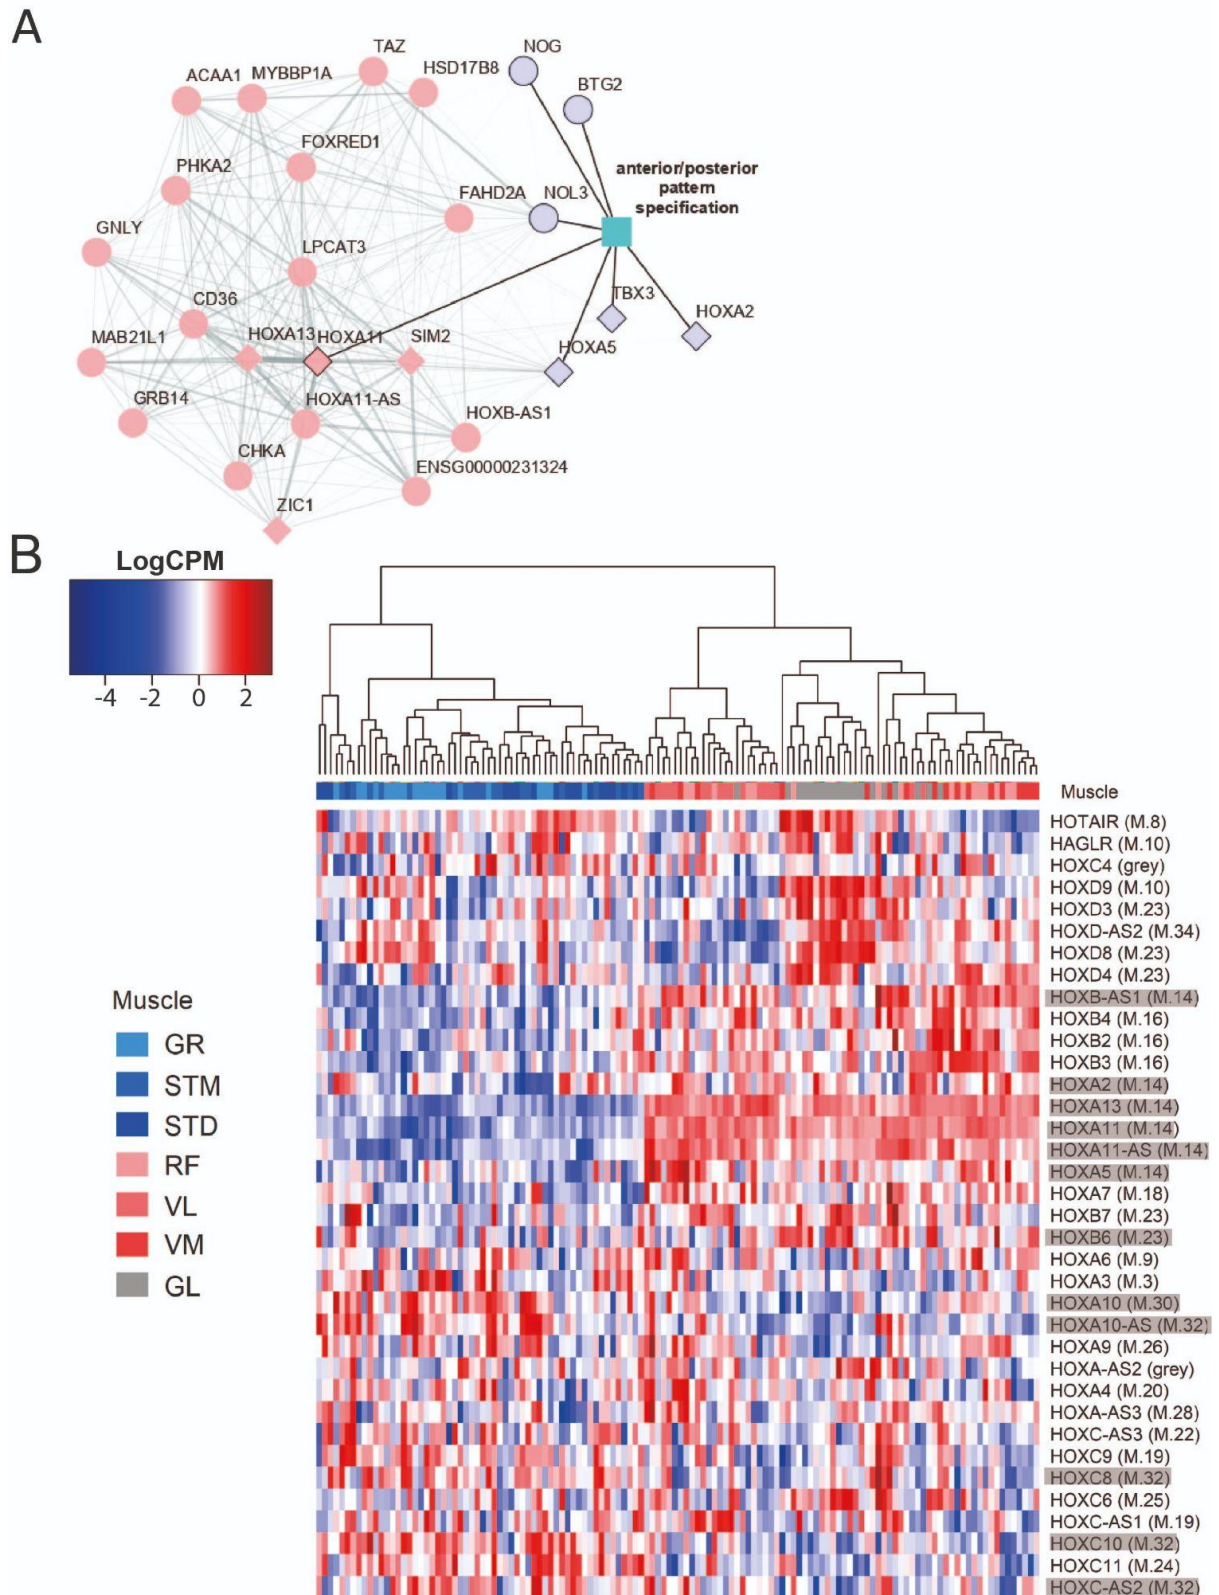

1055

1056 **Figure 7. The expression patterns of *HOX* genes cluster muscles in the same groups. A)**  
1057 **the graph shows the co-expression subnetwork of *HOX* genes and genes related to anterior/posterior**  
1058 **specification assigned to the M.14 module. Diamonds indicate transcription factors while other genes**  
1059 **are indicated by circles. Pink and purple nodes represent the hub genes and non-hub genes,**

1060 respectively. The genes related to anterior/posterior pattern specification have a black border. The  
1061 edge thickness reflects the degree of topological overlap. Topological overlap is defined as a similarity  
1062 measure between each pair of genes in relation to all other genes in the network. High topological  
1063 overlaps indicate that genes share the same neighbors in the co-expression network. **B)** Normalized  
1064 expression of all HOX genes (scaled by row) represented as a heatmap. The hierarchical clustering was  
1065 generated using the normalized expression values. Each row represents a gene and each column  
1066 represents a sample. The side color of columns indicates different muscles. The module in which the  
1067 gene assigned is given between parentheses. Eleven highlighted HOX genes are assigned into muscle-  
1068 related modules which showed the largest differences between the groups of muscles (M.14, M.30,  
1069 and M.32).

1070

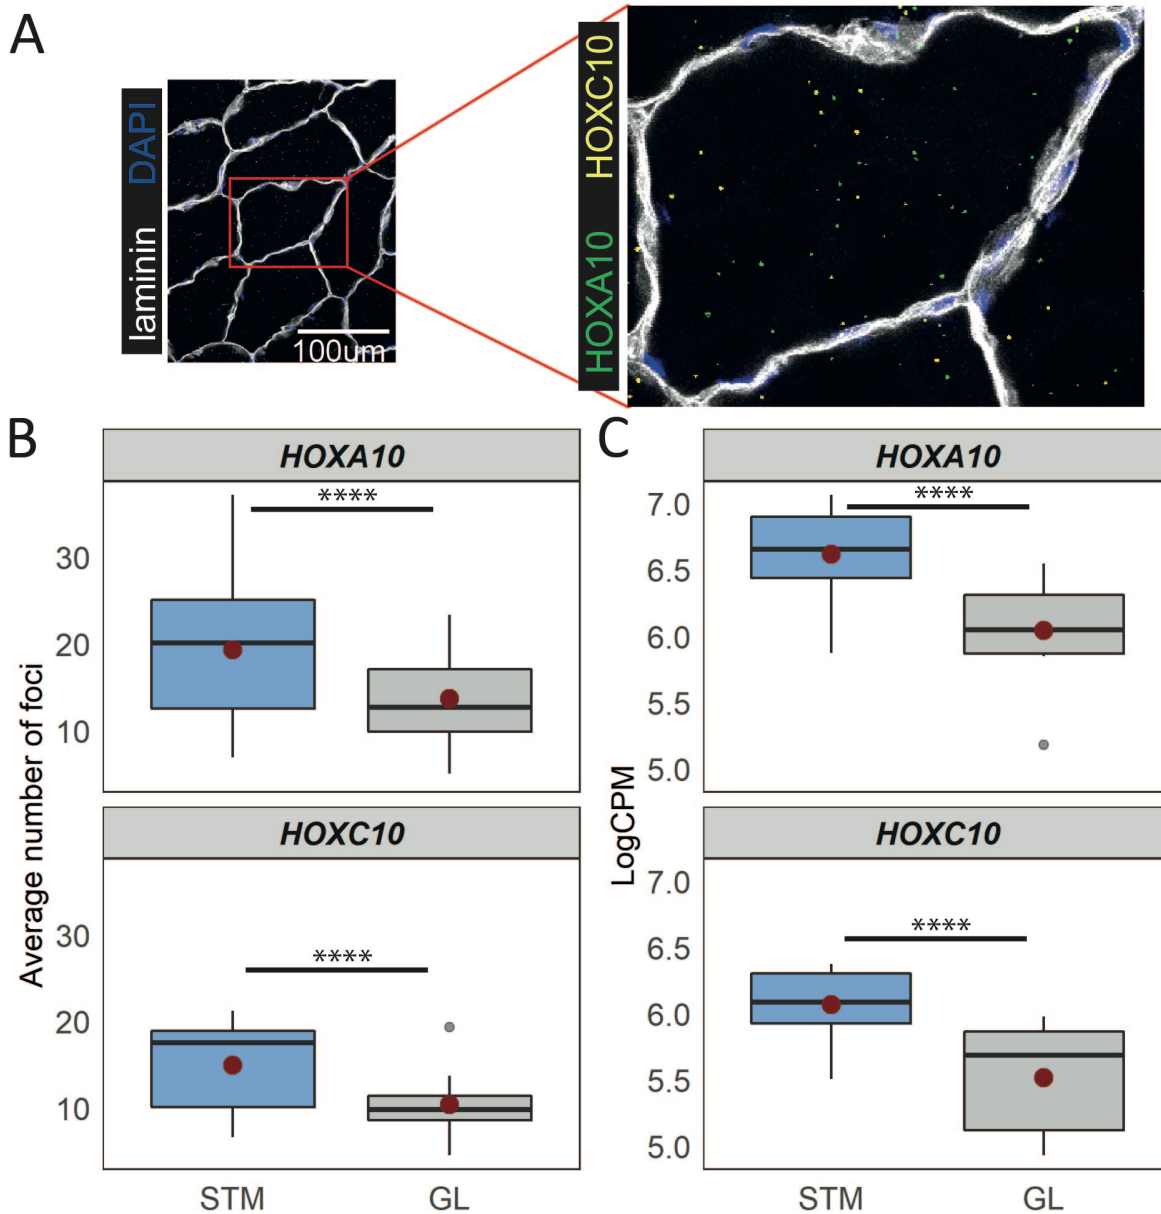

1071

1072 **Figure 8. Distinct expression of HOX genes confirmed by RNAscope. A)** A representative *in situ*  
1073 hybridization image of *HOXC10* and *HOXA10* in muscle cryosections. The image is a merge image of  
1074 the channels used for laminin, DAPI, *HOXC10* and *HOXA10* staining. **B)** The boxplots show the average  
1075 number of foci per myofiber (y-axis) in STM and GL muscles (x-axis). **C)** The boxplots show the  
1076 normalized expression of *HOXA10* (top) and *HOXC10* (bottom) in STM and GL muscles. The boxes  
1077 reflect the median and interquartile range (N = 12 per muscle). The red dots on the boxes show the  
1078 mean. \*\*\*\* *P*-value <  $1 \times 10^{-6}$  (linear mixed-model).

1 **Supplementary data**

2 **Supplementary Tables**

3 **Supplementary Table S1.** Samples' metadata.

4 **Supplementary Table S2.** A combined list of the genes marking different cell types.

5 **Supplementary Table S3.** The result of differential expression analysis.

6 **Supplementary Table S4.** List of genes – modules.

7 **Supplementary Table S5.** List of enriched biological processes and molecular functions within  
8 modules.

9

## 10 Supplementary Figures

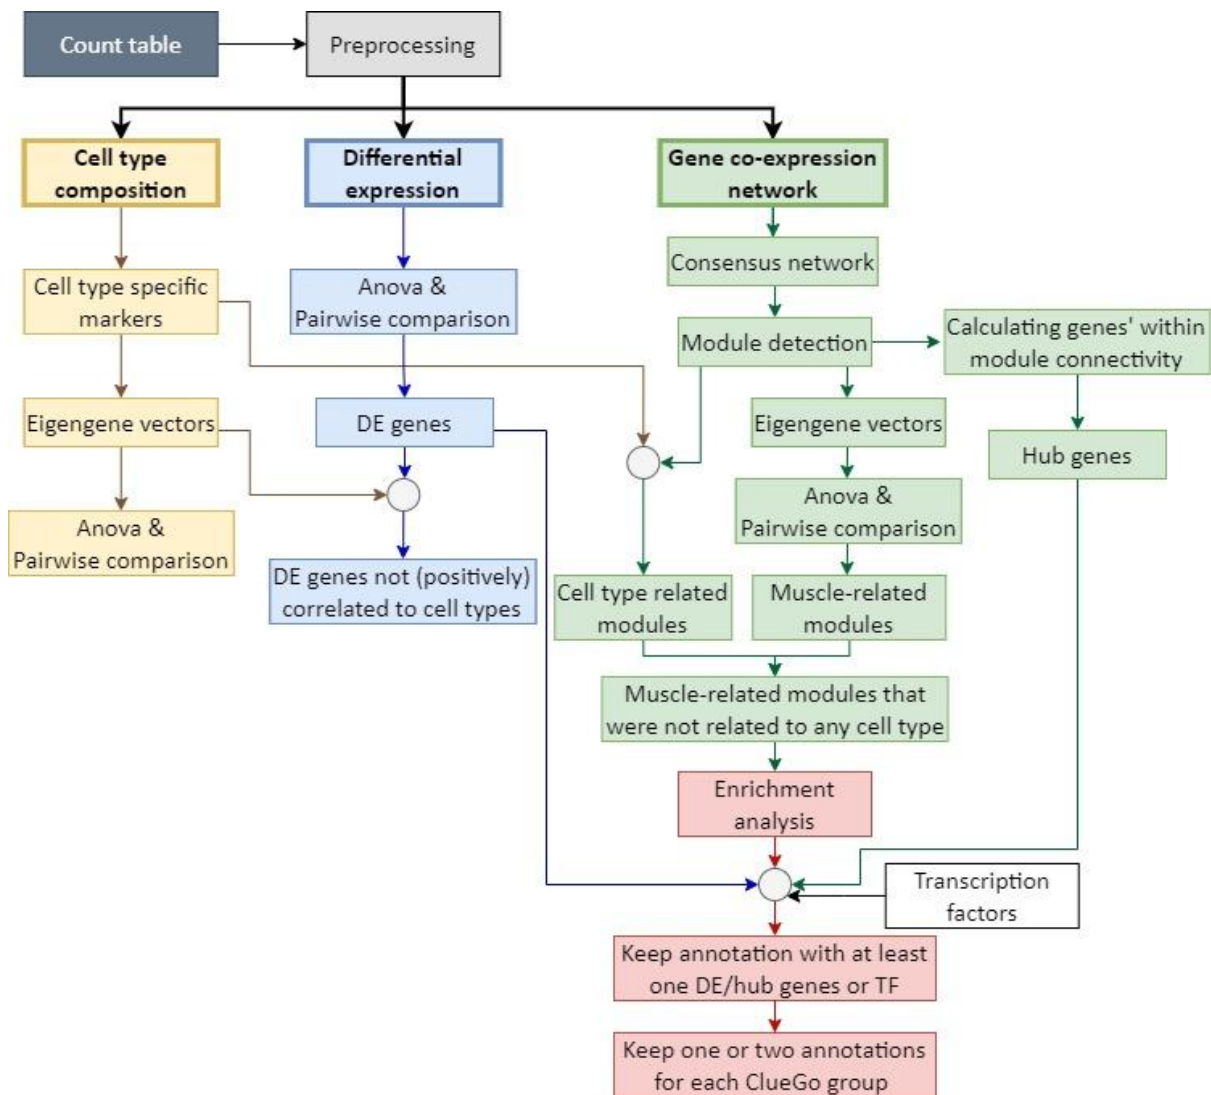

11  
 12 **Supplementary Figure S1. Analysis framework.** A flowchart summarizing the analysis framework used  
 13 to detect molecular signatures characterizing distinct skeletal muscles. Following pre-processing,  
 14 muscle-specific signatures were identified using three approaches: cell type composition analysis (in  
 15 yellow), differential expression analysis (in blue), gene co-expression network analysis (in green), and  
 16 functional enrichment analysis (in red).

17



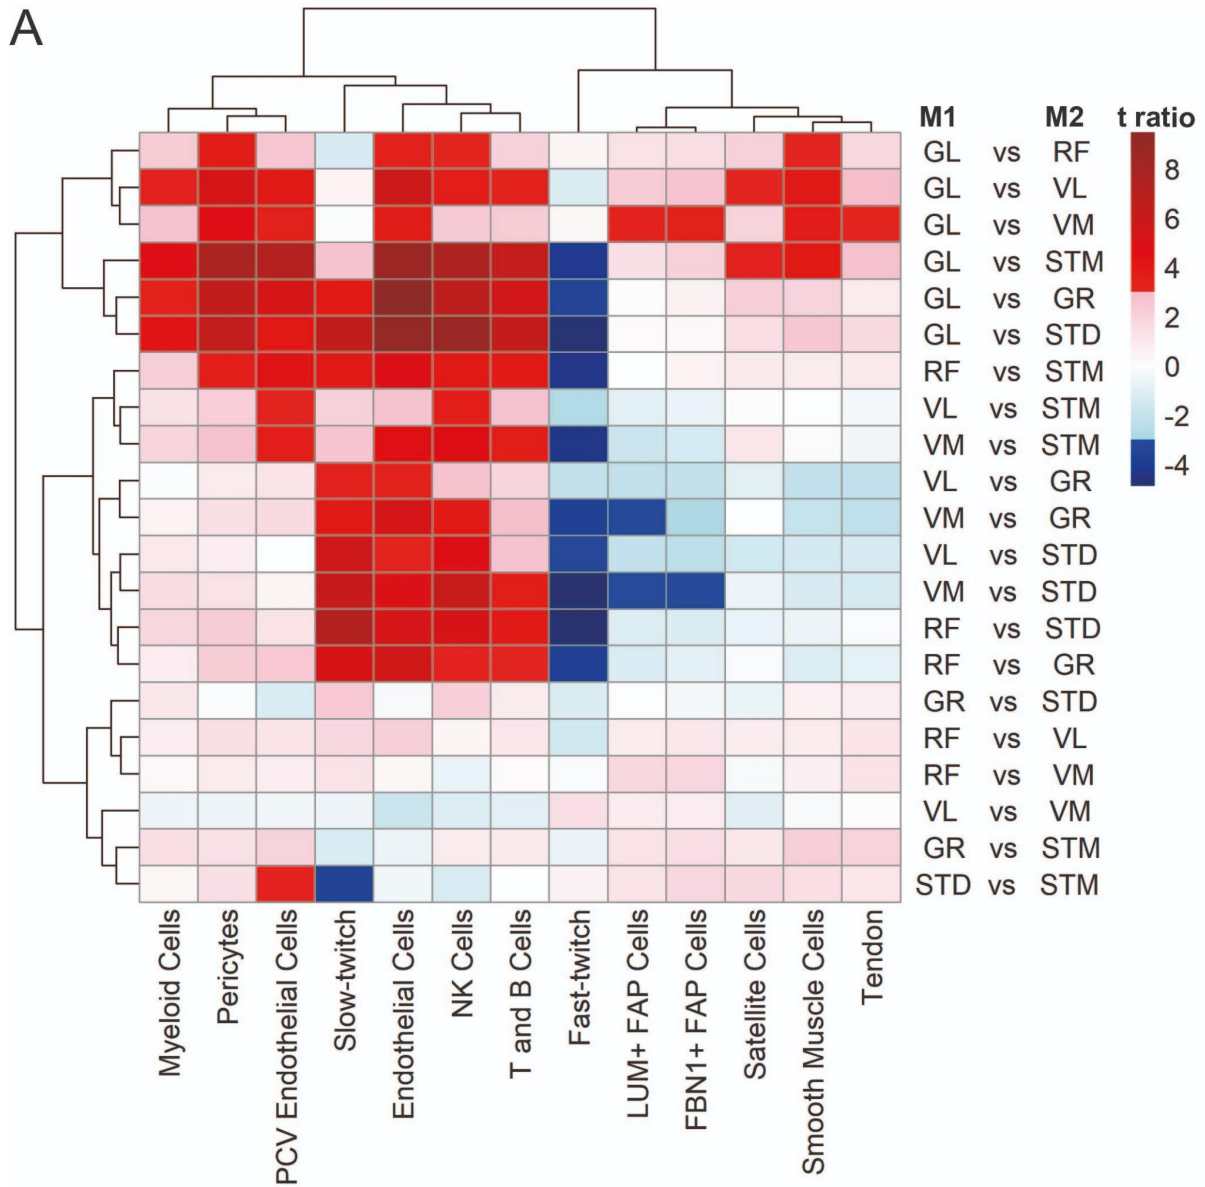

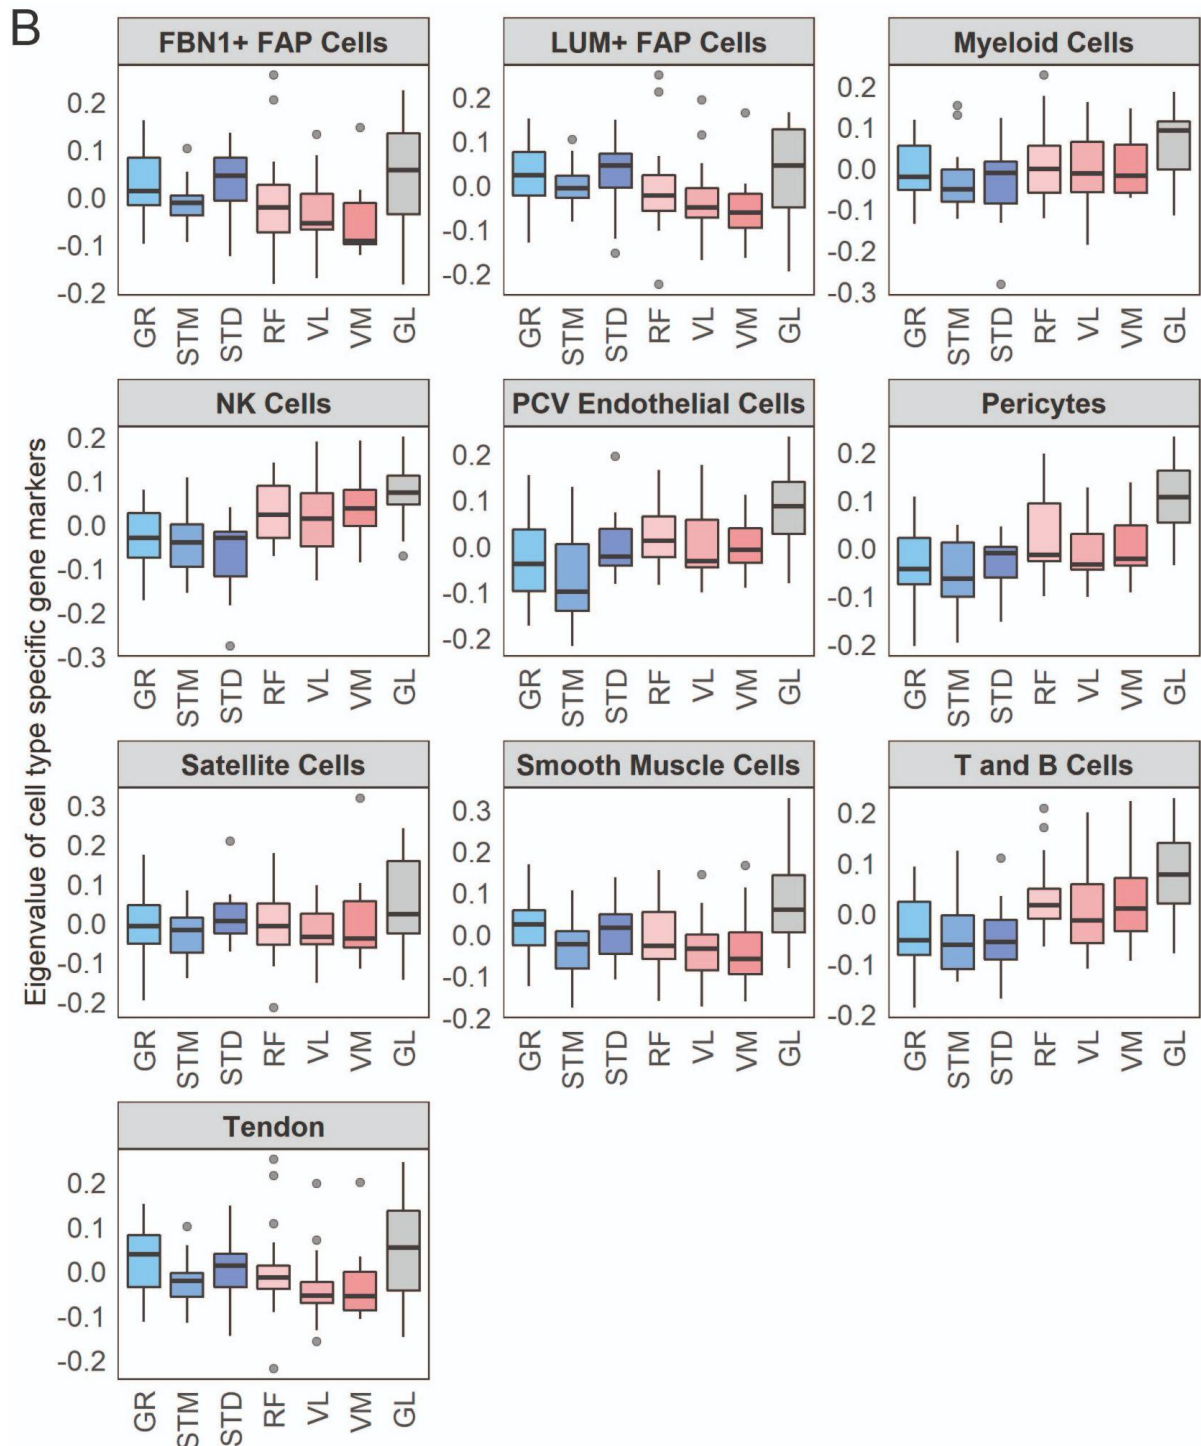

19

20 **Supplementary Figure S2. Cell type composition differences between muscles.** A) The heatmap  
21 shows the differences between each pair of muscles. The statistically significant variation between  
22 muscles was tested by ANOVA followed by the post-hoc pairwise comparisons. Each row corresponds  
23 to a pairwise comparison, and each column shows a cell type. Color-coded cells show the  
24 corresponding t-ratio for the differences in eigenvalue of a cell type in each pairwise comparison. The  
25 significant differences (Tukey p-value < 0.05) are colored red (significantly higher eigenvalues in  
26 muscle M1) or blue (significantly higher eigenvalues in muscle M2). The non-significant differences  
27 are colored from pink (relatively higher eigenvalues in M1) to light blue (relatively higher eigenvalues

28 in M1). **B)** Each boxplot shows the eigenvalues of a cell types across different muscles. The boxes  
29 reflect the median and interquartile range.

30

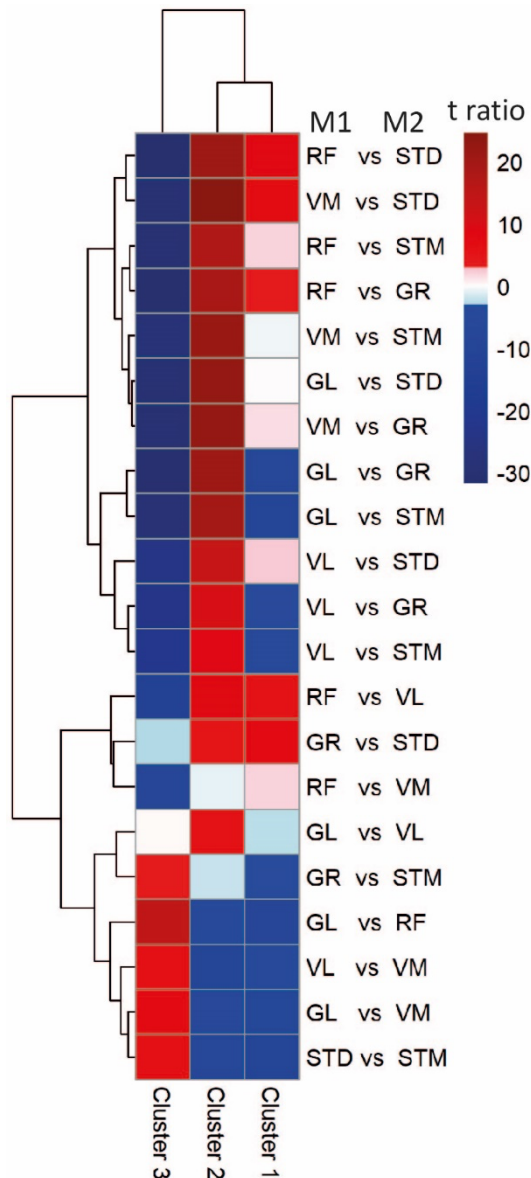

31

32 **Supplementary Figure S3. Myofiber composition differences between muscles.** The heatmap shows  
 33 the differences between each pair of muscles. The statistically significant variation between muscles  
 34 was tested by ANOVA followed by the post-hoc pairwise comparisons. Each row corresponds to a  
 35 myofiber cluster, and each column shows a pairwise comparison. Color-coded cells show the  
 36 corresponding t-ratio for the differences in proportions of myofiber in each pairwise comparison. The  
 37 significant differences (Tukey p-value < 0.05) are colored red (significantly higher proportions in  
 38 muscle M1) or blue (significantly higher proportions in muscle M2). The non-significant differences  
 39 are colored from pink (relatively higher proportions in M1) to light blue (relatively higher proportions  
 40 in M1).

41



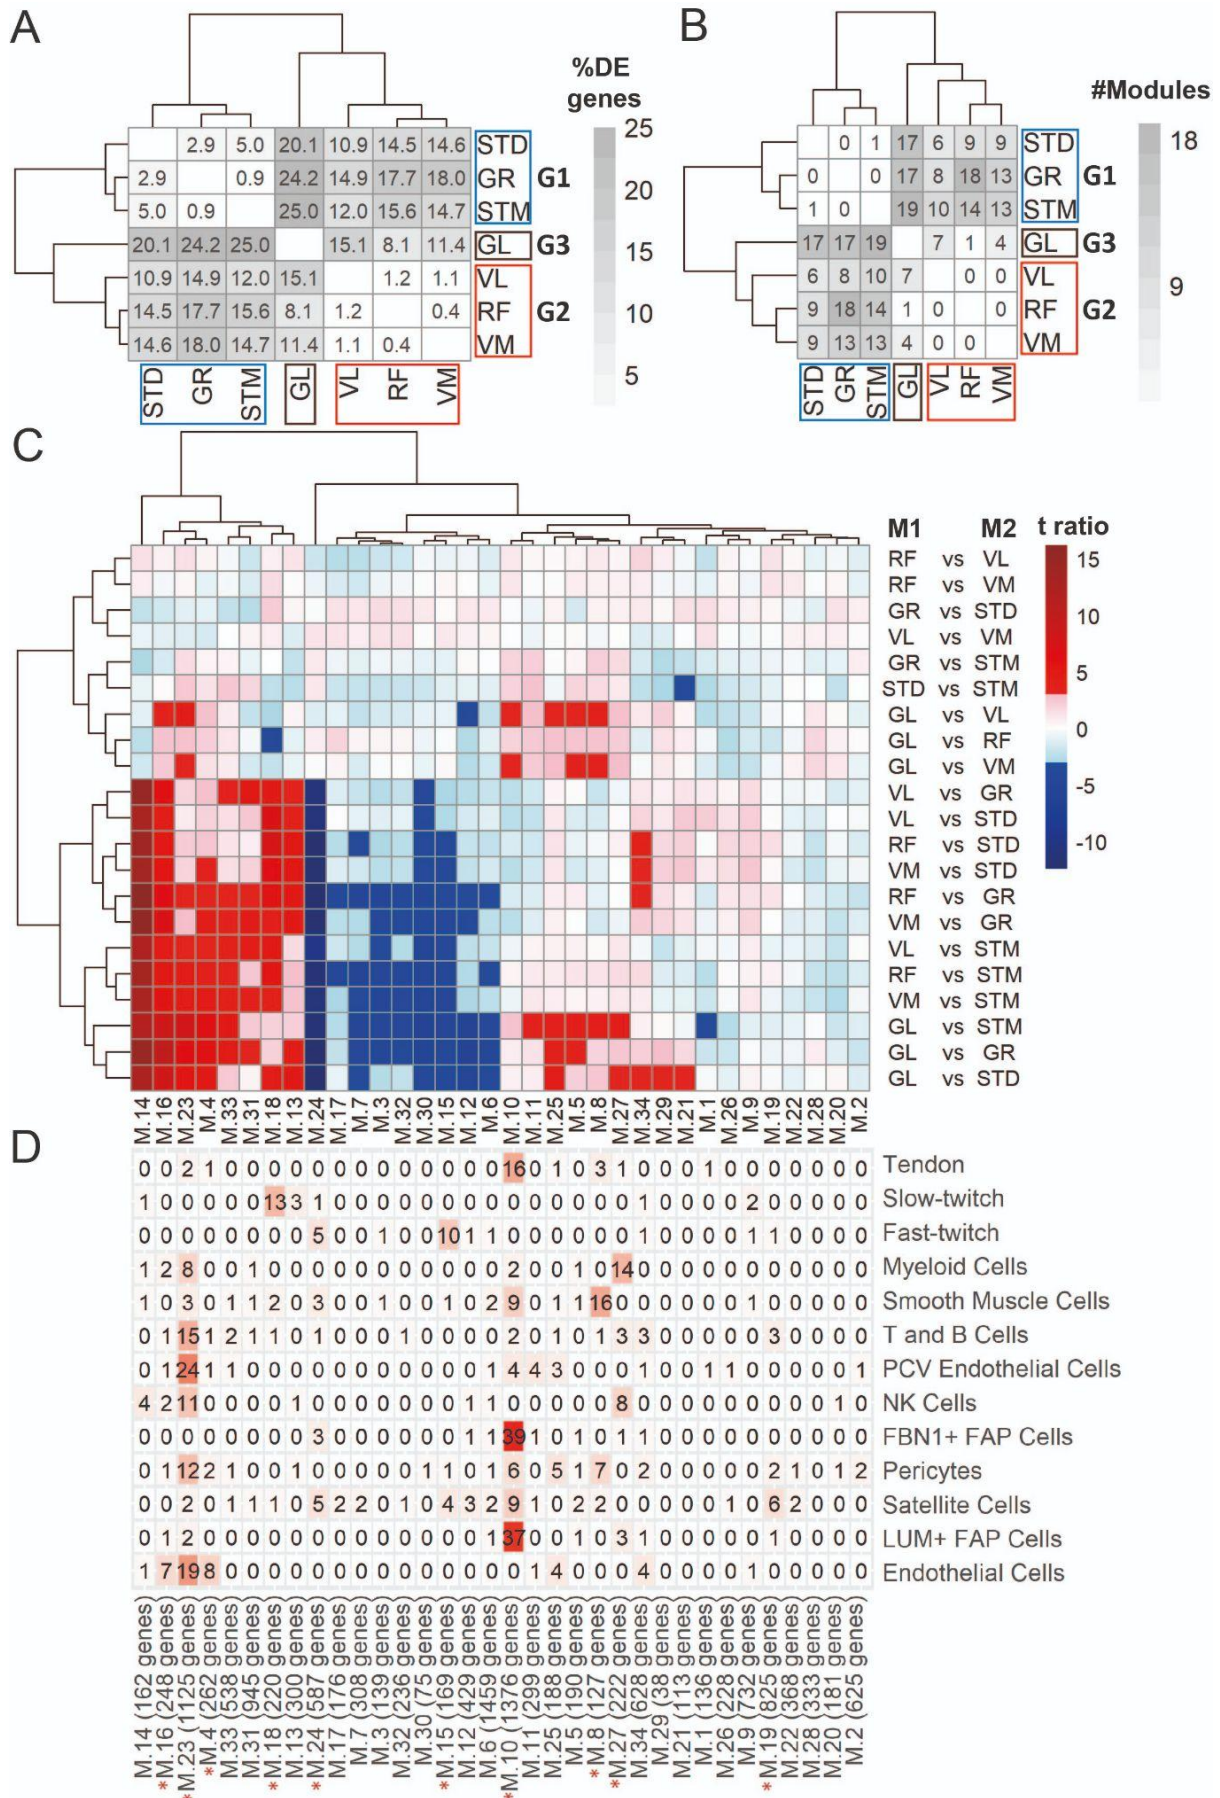



43 **Supplementary Figure S4. DEA and WGCNA also clustered muscles in three groups. A)** Symmetric  
44 heatmap shows the proportion of all differentially expressed genes in different pairwise comparisons.  
45 Each row or column represents a muscle. **B)** Symmetric heatmap shows the number of modules that  
46 were significantly different in each pairwise comparison. Each row or column represents a muscle. **C)**  
47 Each row corresponds to a pairwise comparison and each column shows a muscle-related. Color-  
48 coded cells show the corresponding t-ratio for the differences in eigenvalue of a module in each  
49 pairwise comparison. The significant differences (Tukey p-value < 0.05) are colored red (significantly  
50 higher eigenvalues in M1) or blue (significantly higher eigenvalues in M2). The insignificant differences  
51 are colored from pink (relatively higher eigenvalues in M1) to light blue (relatively higher eigenvalues  
52 in M1). **D)** The table shows the intersection of the genes in the modules (columns) with genes marking  
53 different cell types (rows). Color-coded cells show the corresponding intersection number. The red  
54 asterisks show modules driven by cell type composition.



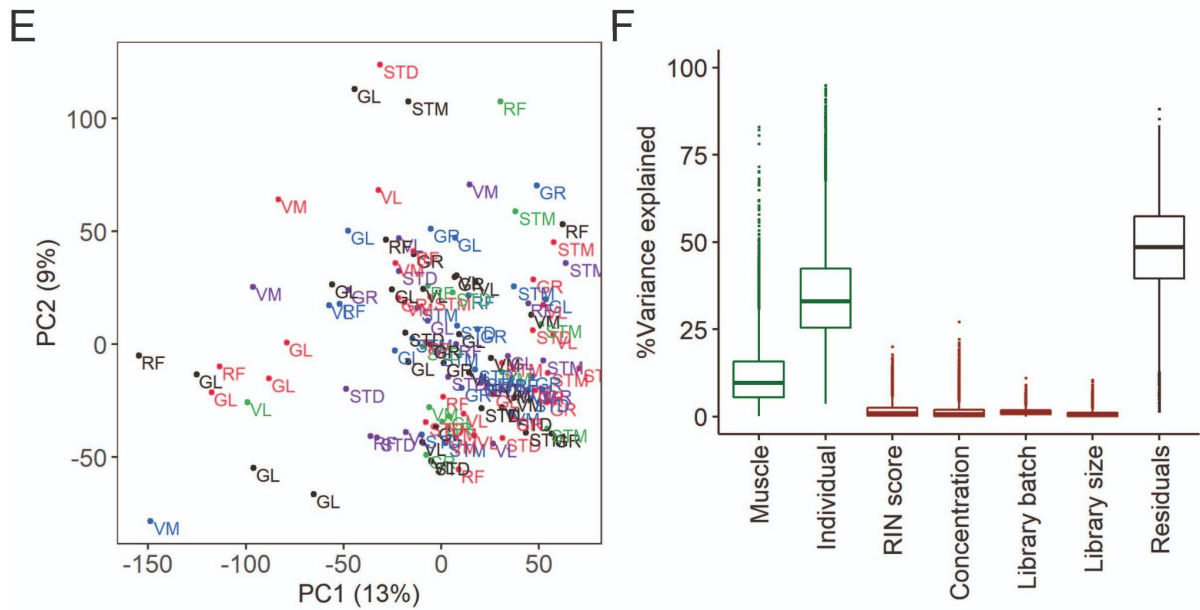

56

57 **Supplementary Figure S5. The quality control and batch correction of RNA-seq data. A)** The PCA plot  
58 shows the effect of the RNA isolation protocols. The scatter plot of PC1 (x-axis) and PC2 (y-axis) shows  
59 GR muscle from five individuals from which RNA was isolated using two RNA isolation protocols. **B)** An  
60 overview of the RNA-seq samples (available from the European Genome Archive, Dataset ID:  
61 EGAS00001005904). An X indicates samples that are not present in the final transcriptome dataset. **C**  
62 **& E)** Scatter plots of PC1 (x-axis) and PC2 (y-axis) before (C) and after (E) batch correction. Each dot  
63 presents a sample labeled by muscle tissue. Each library preparation batch is shown with a different  
64 color. The re-sequenced batch is denoted in black. **D & F)** Box plots show the analysis of variance  
65 before (D) and after (F) batch correction. Y-axis shows the percentage of variance explained by  
66 different factors. The x-axis shows the known biological (muscle and individual, shown in green) and  
67 technical (RIN score, concentration, batch, library size, shown in red) factors. The RNA isolation  
68 protocol effect is captured in the individual effect.

69
